# Supplementary material
Source: ML conference proceedings conference paper supplement (https://openreview.net/forum?id=wUoK24u4x7)

gpt2-small

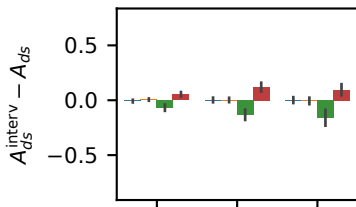

pythia-160m

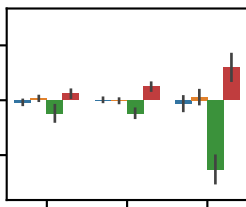

gemma-2-2b

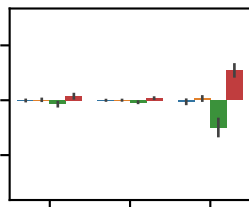
$$A_{ds}^{\text{interv}} - A_{ds}$$
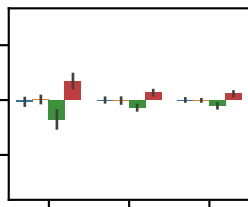

| Number of trials | 10 trials (blue) | 20 trials (orange) | 30 trials (red) |
|------------------|------------------|--------------------|-----------------|
| 10               | ~4.5             | ~5.5               | ~6.5            |
| 20               | ~5.5             | ~6.5               | ~7.5            |
| 30               | ~6.5             | ~7.5               | ~8.5            |

$$A_{ds}^{\text{interv}} - A_{ds}$$
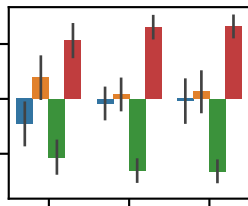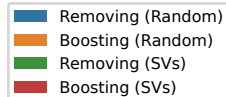

Supplement: supplementary_material [file interventions_attn_weight_effect.pdf › signals-in-the-stream-sm/figures/interventions/interventions_attn_weight_effect.pdf]
