# Supplementary material
Source: ML conference proceedings conference paper supplement (https://openreview.net/forum?id=wUoK24u4x7)

Task: gp; Model: gpt2-small

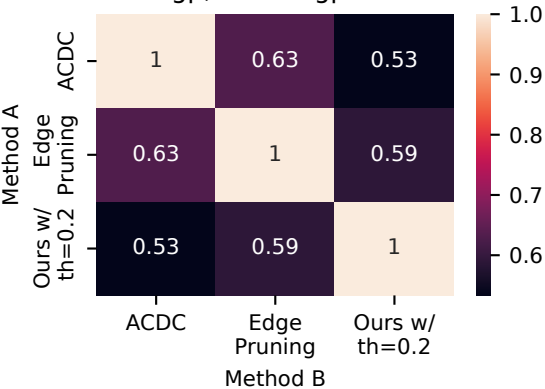

Supplement: supplementary_material [file heatmap_gpt2-small_gp_f1-score.pdf › signals-in-the-stream-sm/circuit_comparison/heatmap_gpt2-small_gp_f1-score.pdf]

Task: gp; Model: gpt2-small

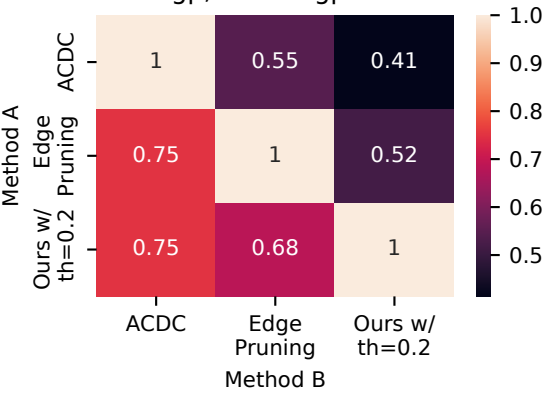

Supplement: supplementary_material [file heatmap_gpt2-small_gp_precision.pdf › signals-in-the-stream-sm/circuit_comparison/heatmap_gpt2-small_gp_precision.pdf]

Task: gp; Model: gpt2-small

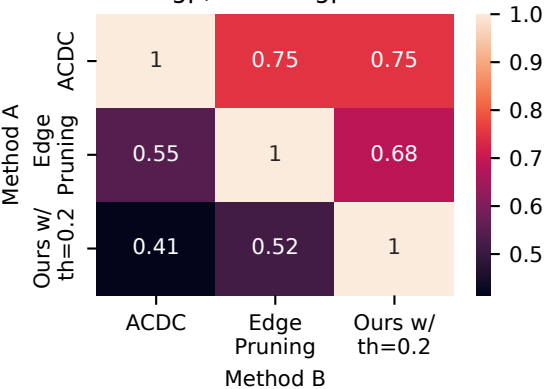

Supplement: supplementary_material [file heatmap_gpt2-small_gp_recall.pdf › signals-in-the-stream-sm/circuit_comparison/heatmap_gpt2-small_gp_recall.pdf]

Task: gt; Model: gpt2-small

Method A

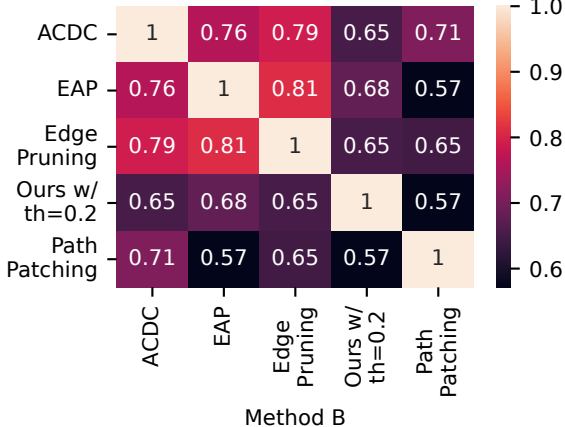

Supplement: supplementary_material [file heatmap_gpt2-small_gt_f1-score.pdf › signals-in-the-stream-sm/circuit_comparison/heatmap_gpt2-small_gt_f1-score.pdf]

Task: gt; Model: gpt2-small

Method A

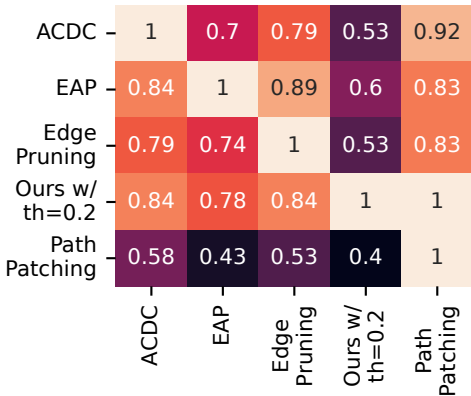

Method B

Supplement: supplementary_material [file heatmap_gpt2-small_gt_precision.pdf › signals-in-the-stream-sm/circuit_comparison/heatmap_gpt2-small_gt_precision.pdf]

Task: gt; Model: gpt2-small

Method A

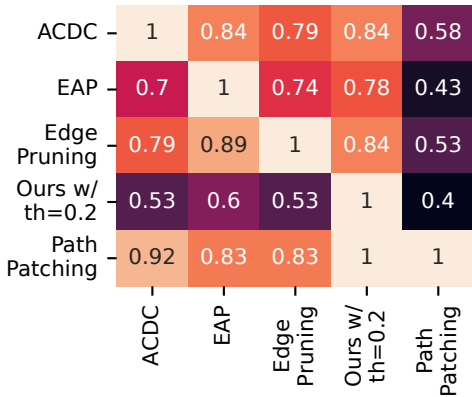

Method B

Supplement: supplementary_material [file heatmap_gpt2-small_gt_recall.pdf › signals-in-the-stream-sm/circuit_comparison/heatmap_gpt2-small_gt_recall.pdf]

Task: ioi; Model: gpt2-small

Method A

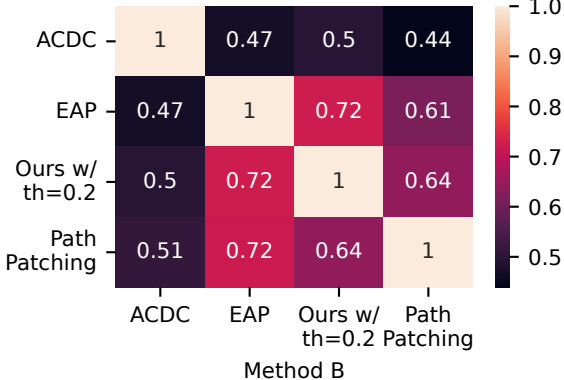

Supplement: supplementary_material [file heatmap_gpt2-small_ioi_f1-score.pdf › signals-in-the-stream-sm/circuit_comparison/heatmap_gpt2-small_ioi_f1-score.pdf]

Task: ioi; Model: gpt2-small

Method A

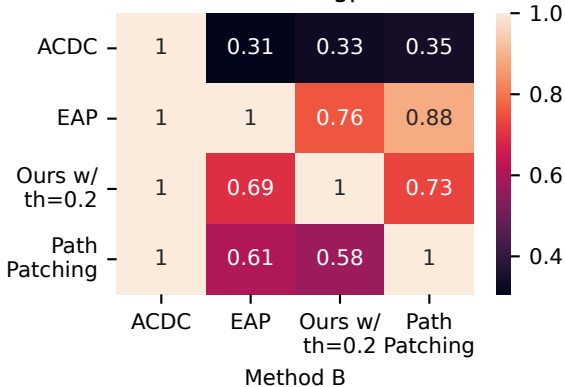

Supplement: supplementary_material [file heatmap_gpt2-small_ioi_precision.pdf › signals-in-the-stream-sm/circuit_comparison/heatmap_gpt2-small_ioi_precision.pdf]

Task: ioi; Model: gpt2-small

Method A

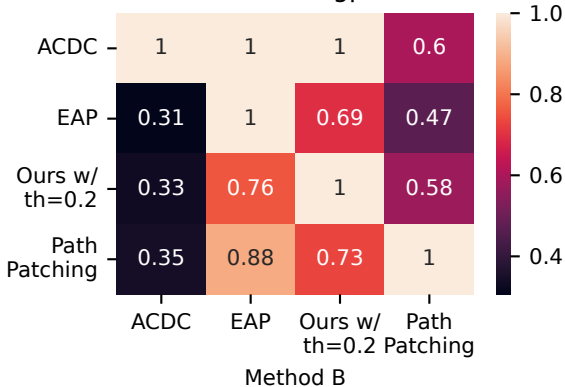

Supplement: supplementary_material [file heatmap_gpt2-small_ioi_recall.pdf › signals-in-the-stream-sm/circuit_comparison/heatmap_gpt2-small_ioi_recall.pdf]

Task: ioi; Model: pythia-160m

Method A

EAP-IG  
Ours w/  
th=0.2

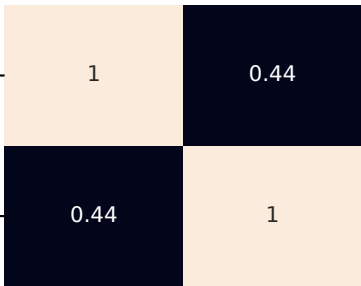

EAP-IG

Ours w/  
th=0.2

Method B

Supplement: supplementary_material [file heatmap_pythia-160m_ioi.pdf › signals-in-the-stream-sm/circuit_comparison/heatmap_pythia-160m_ioi.pdf]

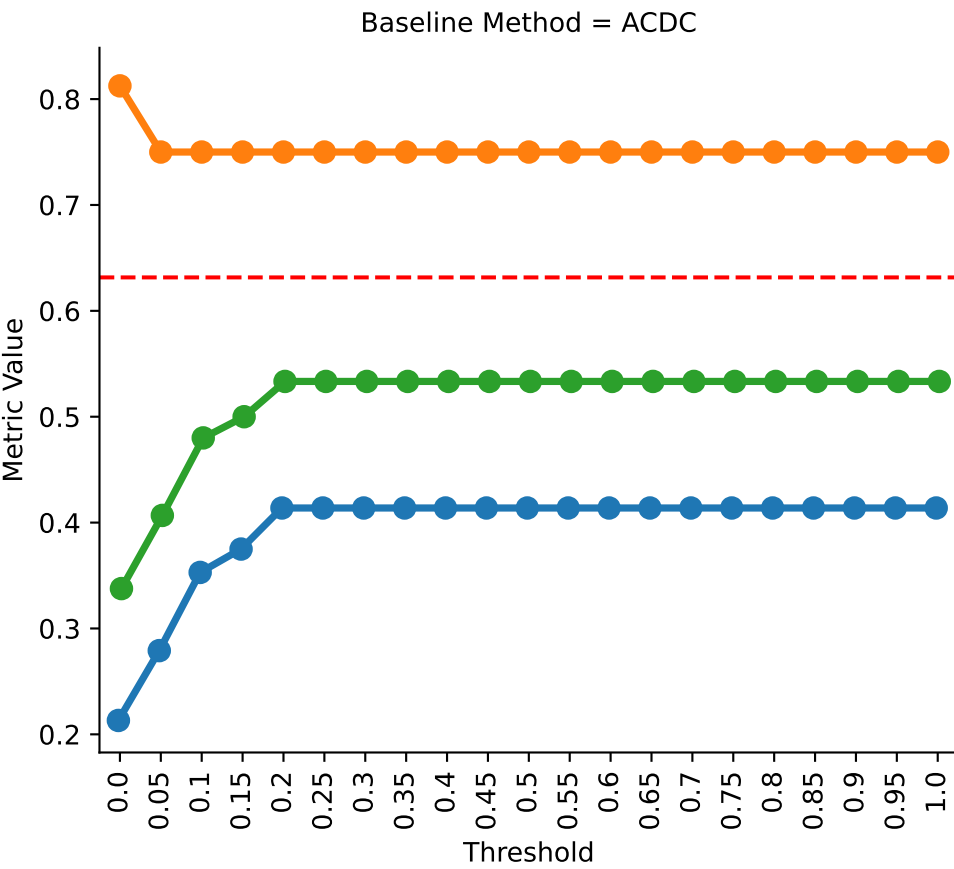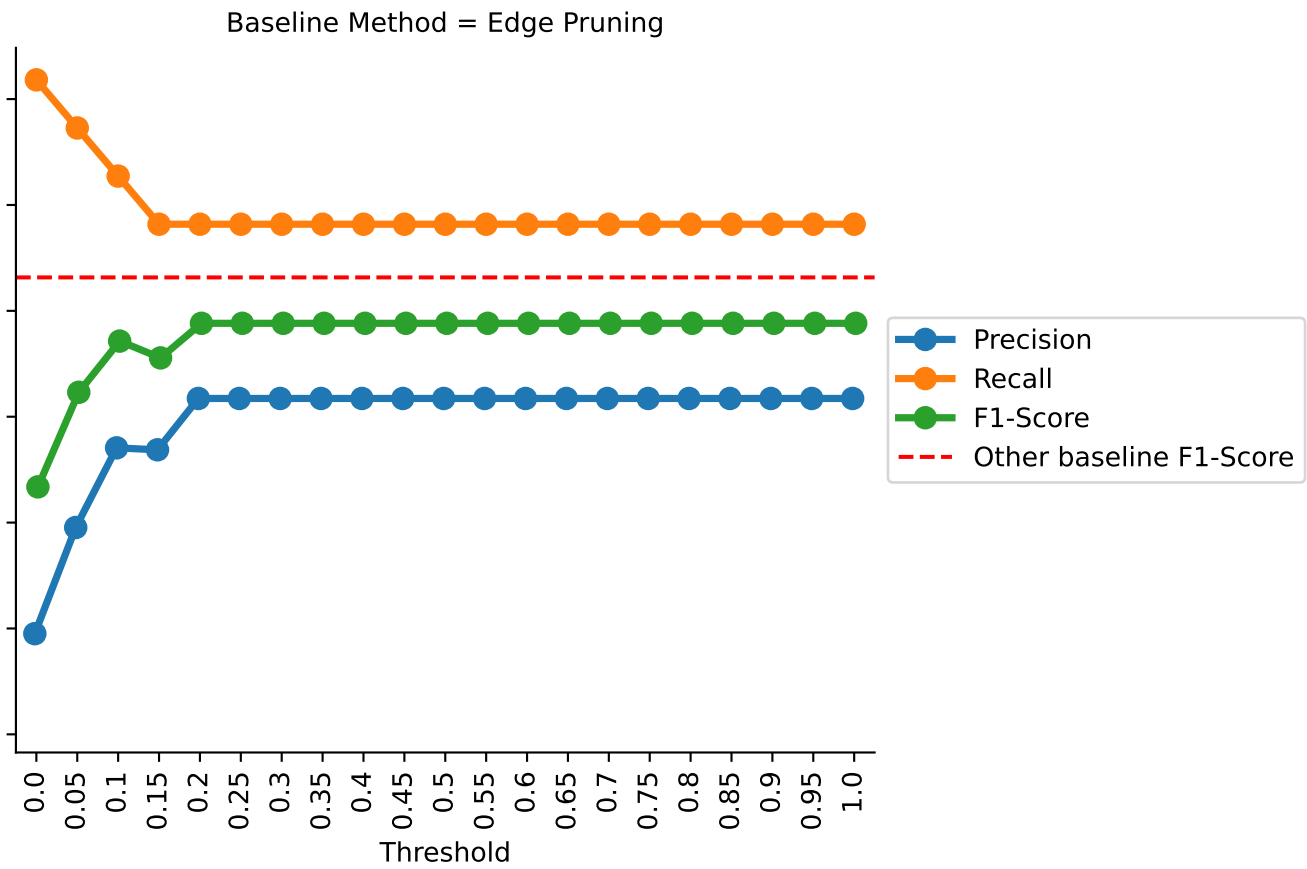

Supplement: supplementary_material [file lineplot_gpt2-small_gp.pdf › signals-in-the-stream-sm/circuit_comparison/lineplot_gpt2-small_gp.pdf]

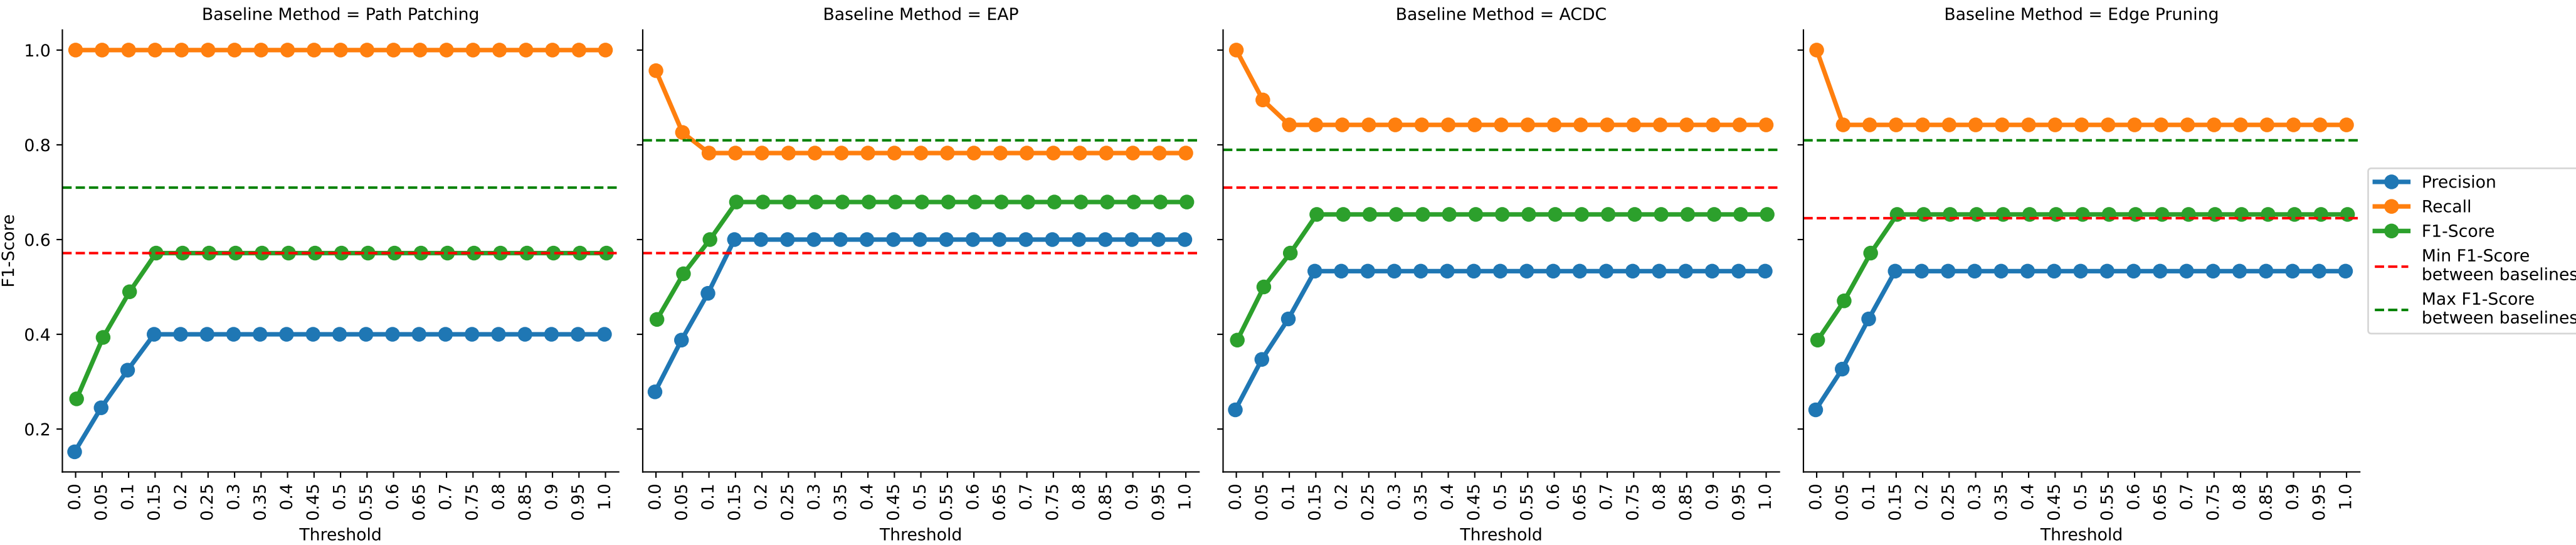

Supplement: supplementary_material [file lineplot_gpt2-small_gt.pdf › signals-in-the-stream-sm/circuit_comparison/lineplot_gpt2-small_gt.pdf]

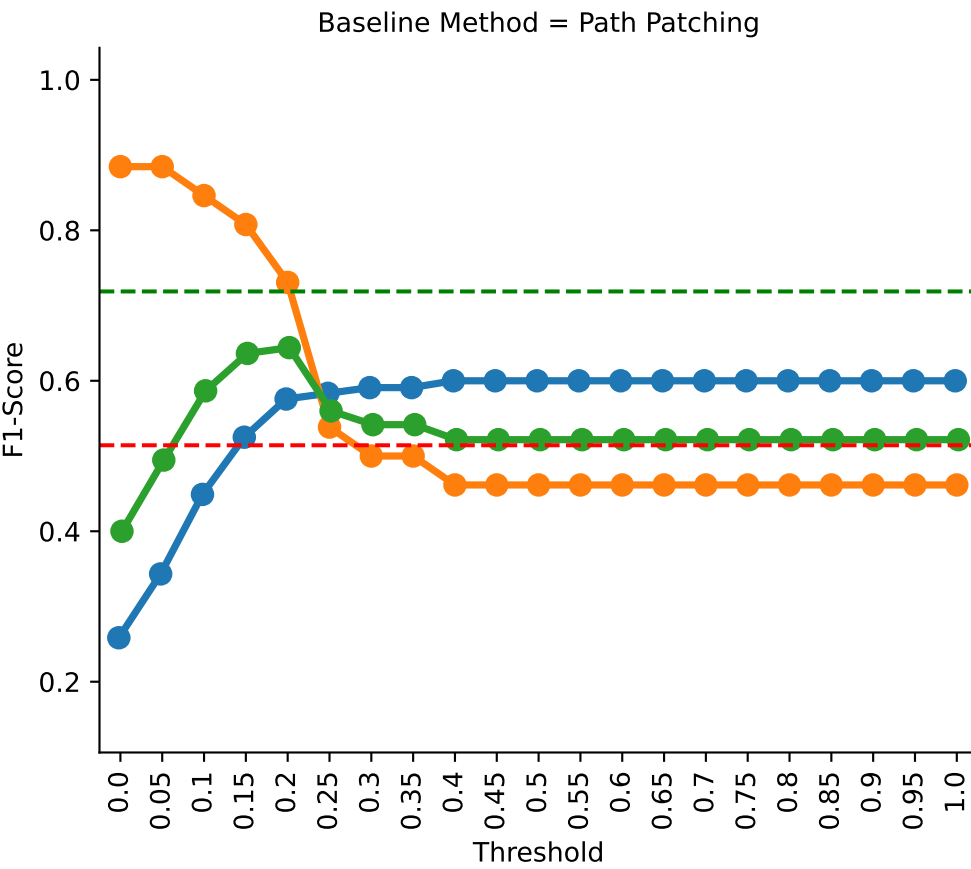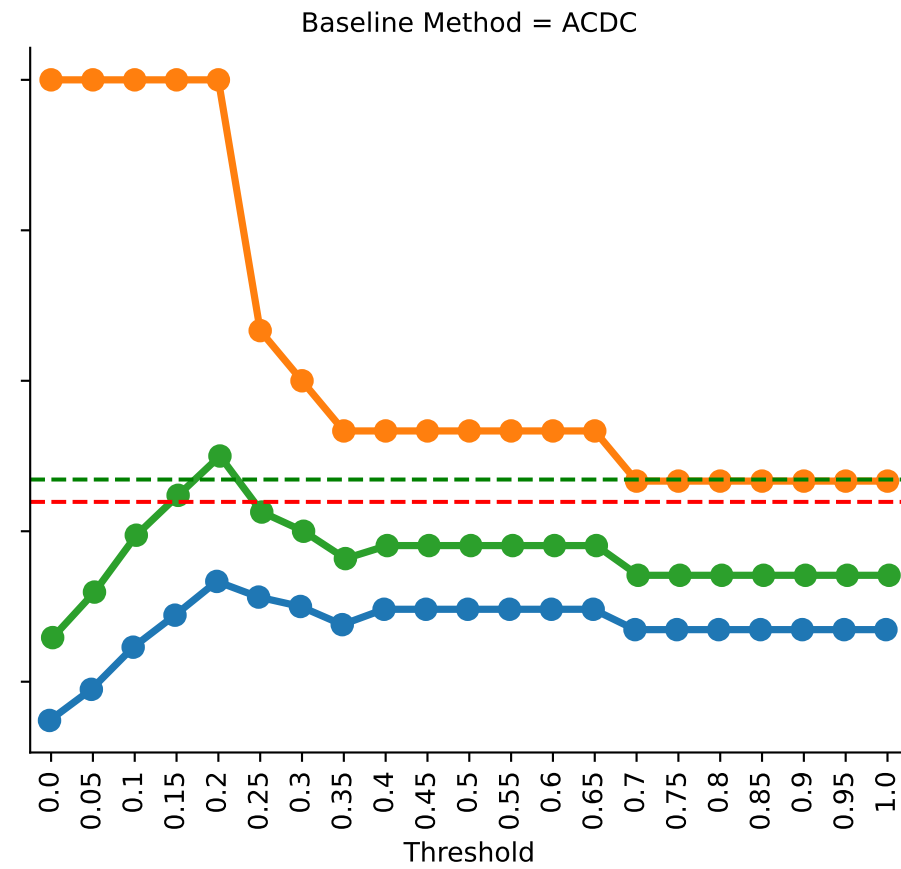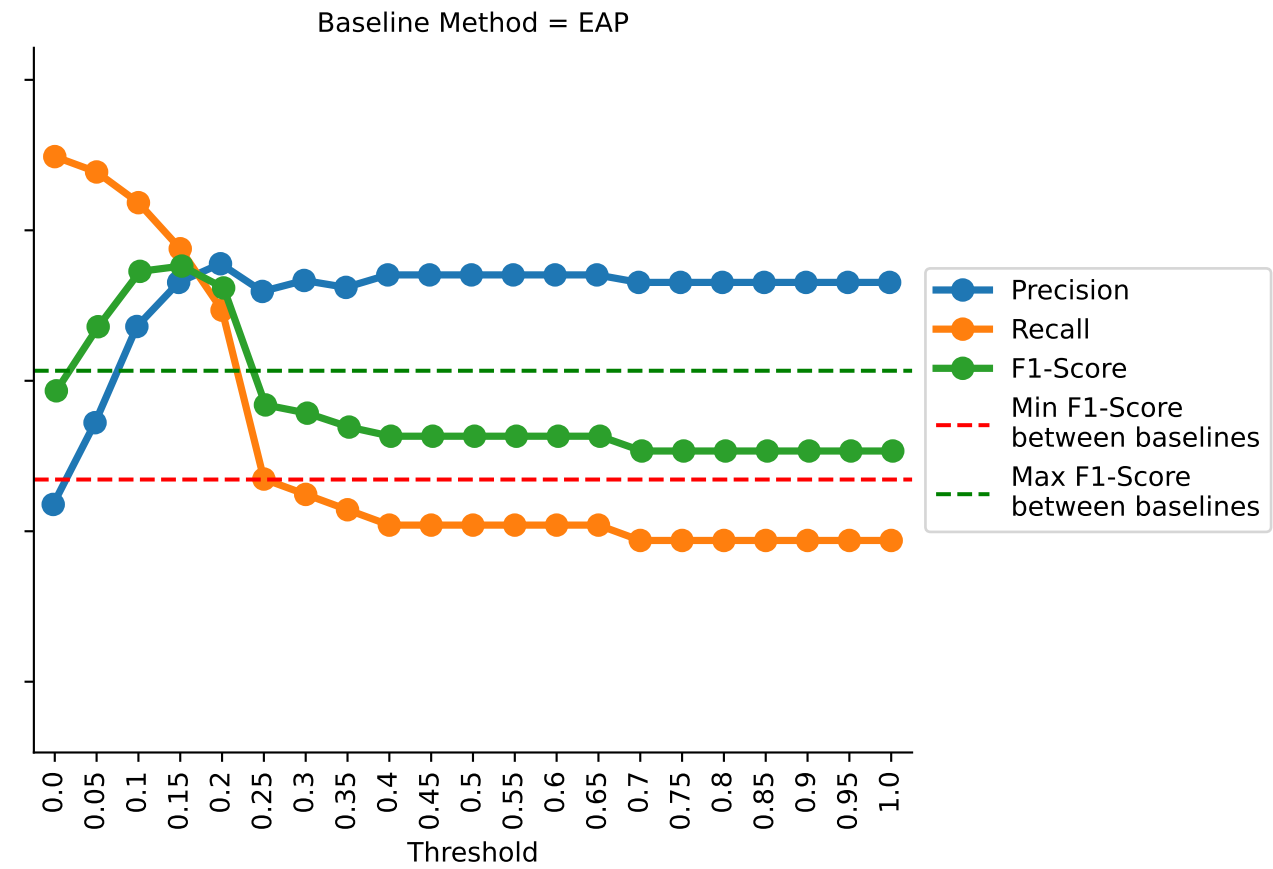

Supplement: supplementary_material [file lineplot_gpt2-small_ioi.pdf › signals-in-the-stream-sm/circuit_comparison/lineplot_gpt2-small_ioi.pdf]

Task: ioi; Model: pythia-160m

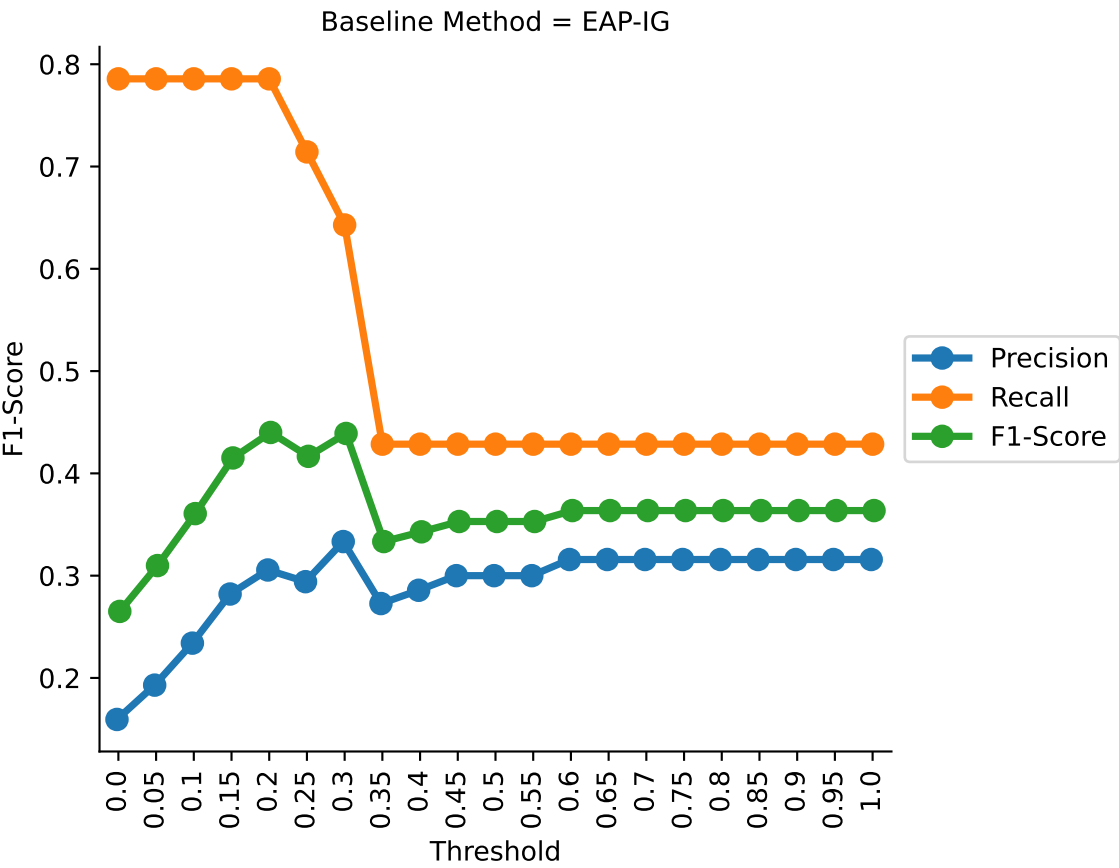

Supplement: supplementary_material [file lineplot_pythia-160m_ioi.pdf › signals-in-the-stream-sm/circuit_comparison/lineplot_pythia-160m_ioi.pdf]

pythia-160m, IOI

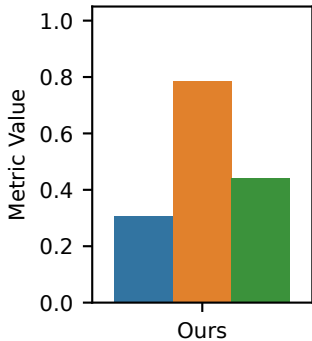

gpt2-small, IOI

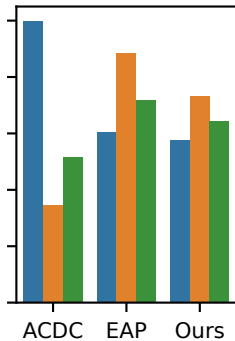

gpt2-small, GP

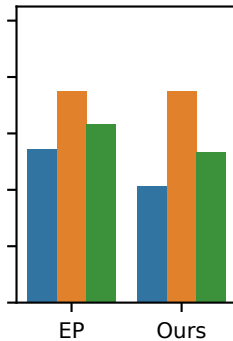

gpt2-small, GT

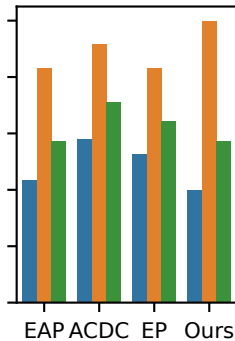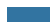

Precision

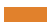

Recall

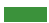

F1-Score

Supplement: supplementary_material [file circuit_comparison.pdf › signals-in-the-stream-sm/figures/circuit_comparison/circuit_comparison.pdf]

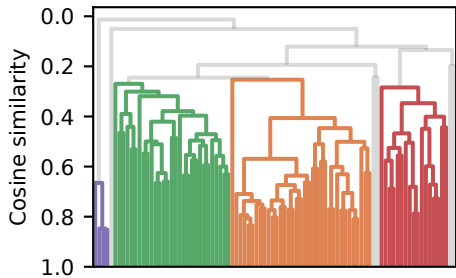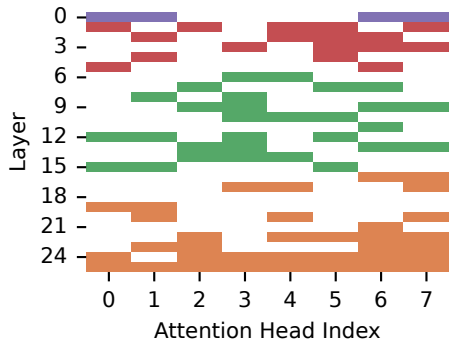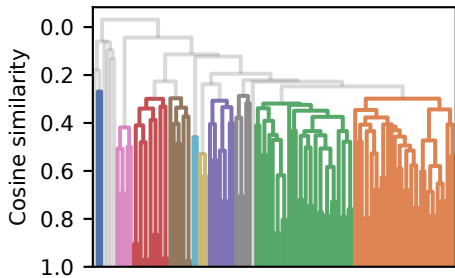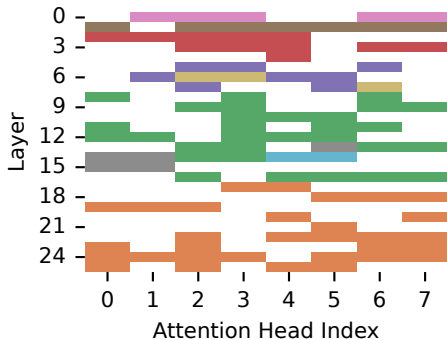

Supplement: supplementary_material [file gemma-2-2b_control-signals.pdf › signals-in-the-stream-sm/figures/control_signals/gemma-2-2b_control-signals.pdf]

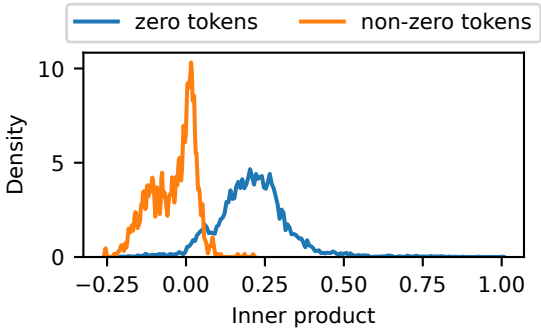

Supplement: supplementary_material [file gemma-2-2b_control-signals_ip_v-signals.pdf › signals-in-the-stream-sm/figures/control_signals/gemma-2-2b_control-signals_ip_v-signals.pdf]

Cosine similarity

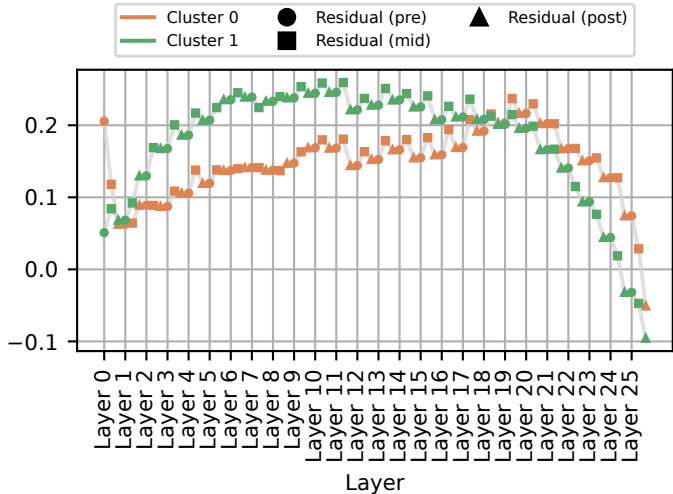

Supplement: supplementary_material [file gemma-2-2b_ioi_u-signals_end_pid-8.pdf › signals-in-the-stream-sm/figures/control_signals/gemma-2-2b_ioi_u-signals_end_pid-8.pdf]

Cosine similarity

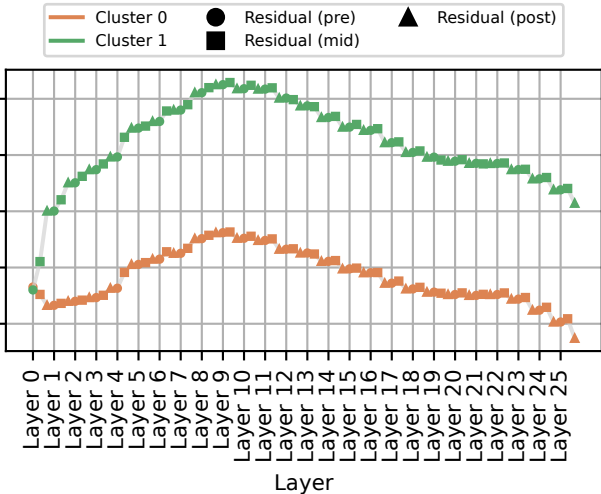

Supplement: supplementary_material [file gemma-2-2b_ioi_v-signals_starts_pid-8.pdf › signals-in-the-stream-sm/figures/control_signals/gemma-2-2b_ioi_v-signals_starts_pid-8.pdf]

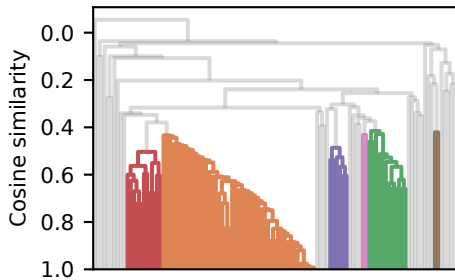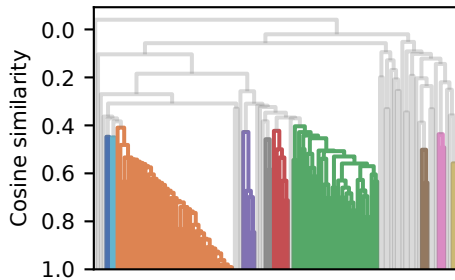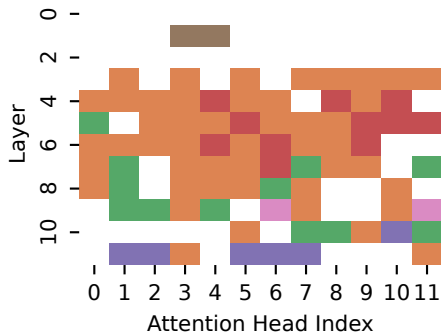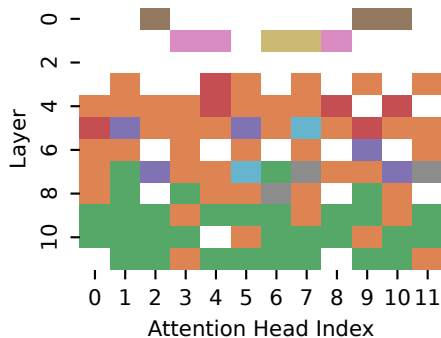

Supplement: supplementary_material [file gpt-2-small_control-signals.pdf › signals-in-the-stream-sm/figures/control_signals/gpt-2-small_control-signals.pdf]

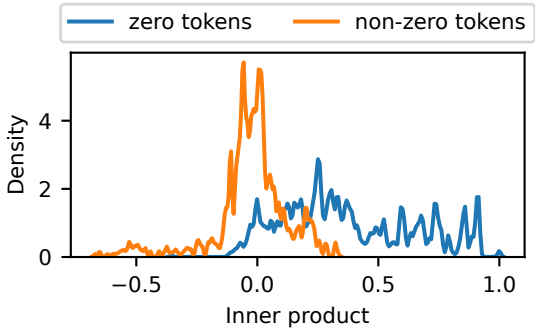

Supplement: supplementary_material [file gpt2-small_control-signals_ip_v-signals.pdf › signals-in-the-stream-sm/figures/control_signals/gpt2-small_control-signals_ip_v-signals.pdf]

Cosine similarity

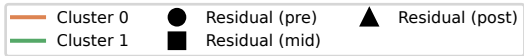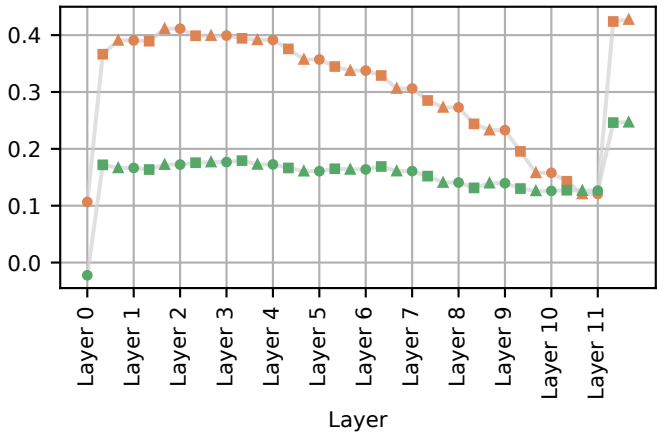

Supplement: supplementary_material [file gpt2-small_ioi_u-signals_end_pid-8.pdf › signals-in-the-stream-sm/figures/control_signals/gpt2-small_ioi_u-signals_end_pid-8.pdf]

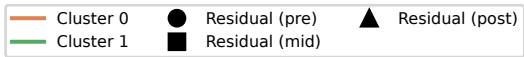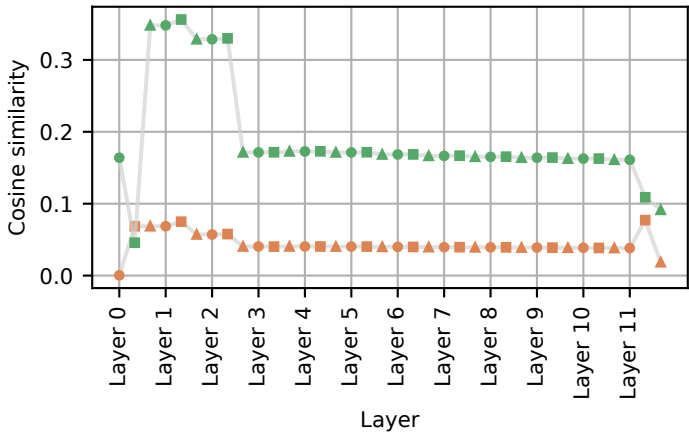

Supplement: supplementary_material [file gpt2-small_ioi_v-signals_starts_pid-8.pdf › signals-in-the-stream-sm/figures/control_signals/gpt2-small_ioi_v-signals_starts_pid-8.pdf]

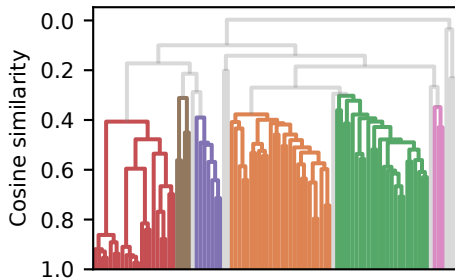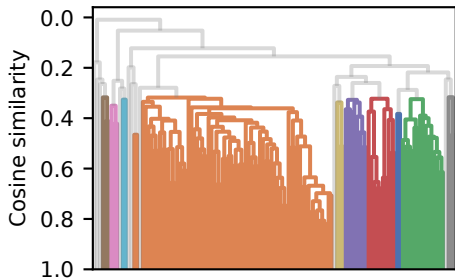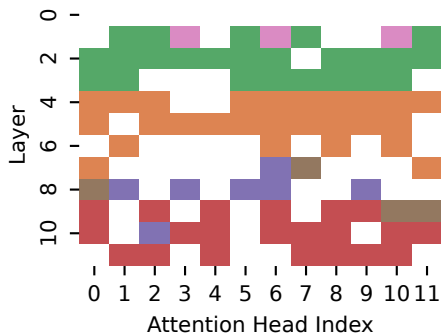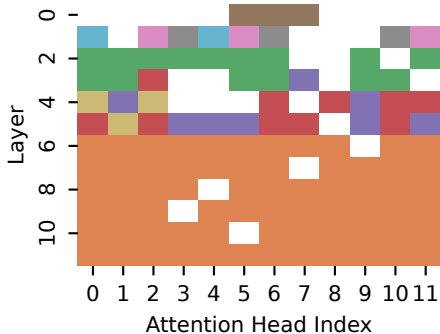

Supplement: supplementary_material [file pythia-160m_control-signals.pdf › signals-in-the-stream-sm/figures/control_signals/pythia-160m_control-signals.pdf]

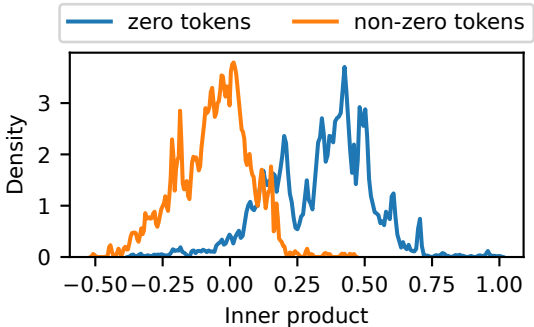

Supplement: supplementary_material [file pythia-160m_control-signals_ip_v-signals.pdf › signals-in-the-stream-sm/figures/control_signals/pythia-160m_control-signals_ip_v-signals.pdf]

Cosine similarity

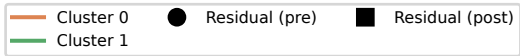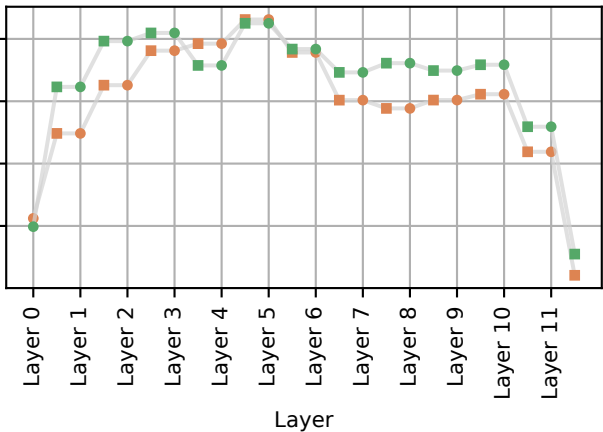

Supplement: supplementary_material [file pythia-160m_ioi_u-signals_end_pid-8.pdf › signals-in-the-stream-sm/figures/control_signals/pythia-160m_ioi_u-signals_end_pid-8.pdf]

Cosine similarity

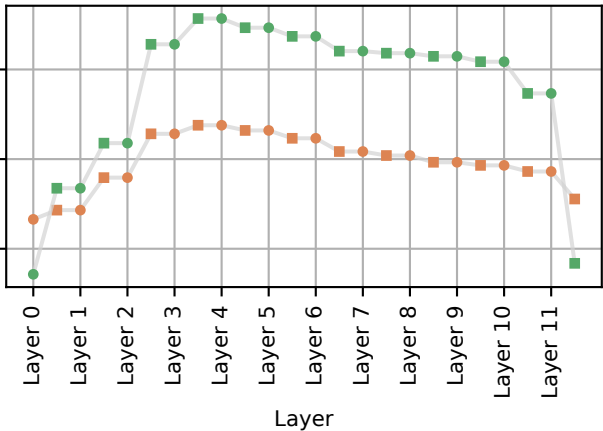

Supplement: supplementary_material [file pythia-160m_ioi_v-signals_starts_pid-8.pdf › signals-in-the-stream-sm/figures/control_signals/pythia-160m_ioi_v-signals_starts_pid-8.pdf]

gpt2-small

pythia-160m

gemma-2-2b

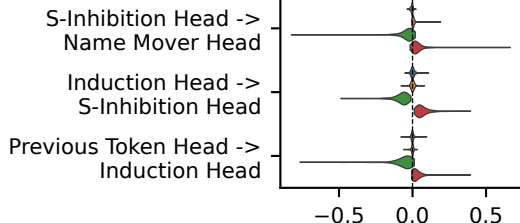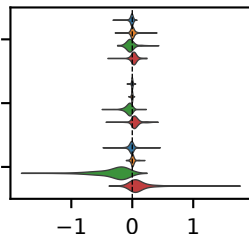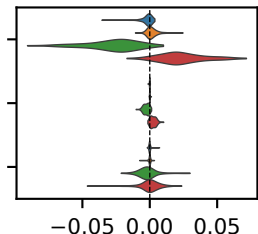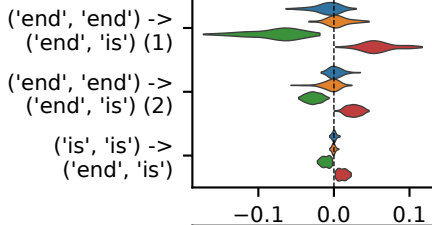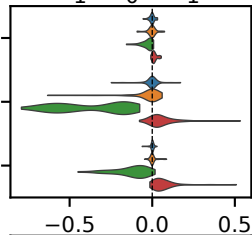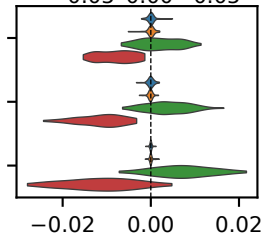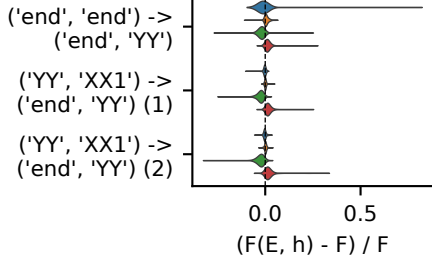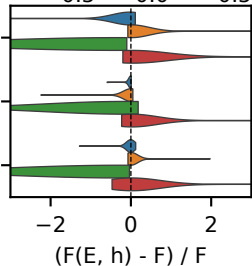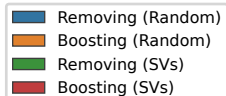

Supplement: supplementary_material [file interventions.pdf › signals-in-the-stream-sm/figures/interventions/interventions.pdf]

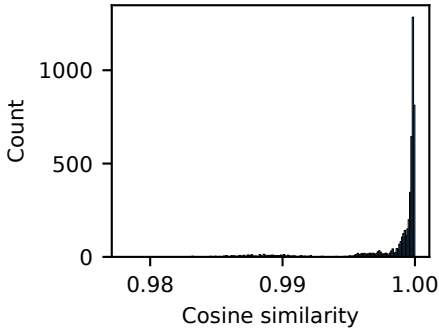

Supplement: supplementary_material [file interventions_cosine_similarity_not-random.pdf › signals-in-the-stream-sm/figures/interventions/interventions_cosine_similarity_not-random.pdf]

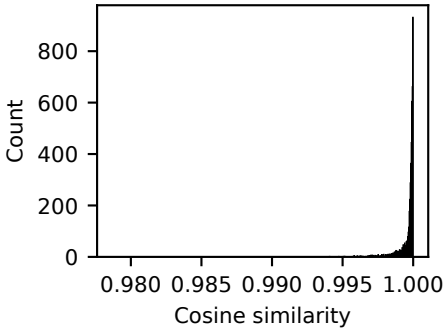

Supplement: supplementary_material [file interventions_cosine_similarity_random.pdf › signals-in-the-stream-sm/figures/interventions/interventions_cosine_similarity_random.pdf]

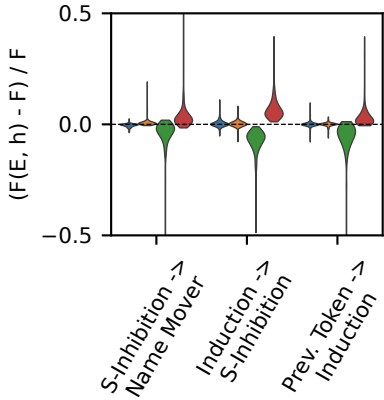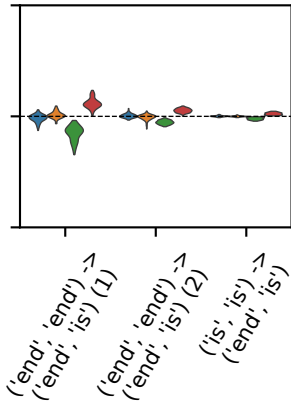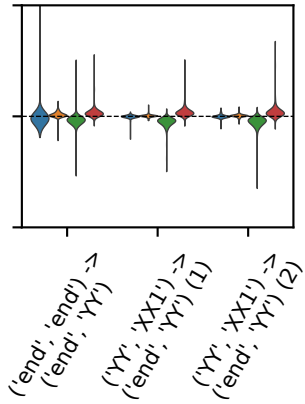

Supplement: supplementary_material [file interventions_gpt2-small.pdf › signals-in-the-stream-sm/figures/interventions/interventions_gpt2-small.pdf]

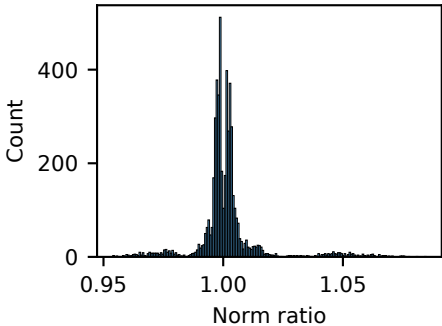

Supplement: supplementary_material [file interventions_norm_ratio_not-random.pdf › signals-in-the-stream-sm/figures/interventions/interventions_norm_ratio_not-random.pdf]

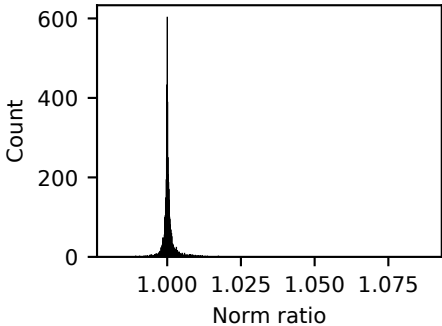

Supplement: supplementary_material [file interventions_norm_ratio_random.pdf › signals-in-the-stream-sm/figures/interventions/interventions_norm_ratio_random.pdf]

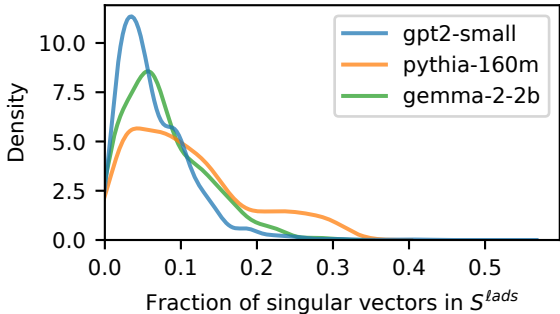

Supplement: supplementary_material [file distribution_n-svs_gp.pdf › signals-in-the-stream-sm/figures/sparse_attn_decomp/distribution_n-svs_gp.pdf]

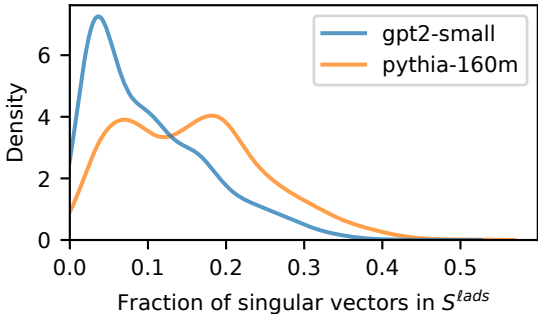

Supplement: supplementary_material [file distribution_n-svs_gt.pdf › signals-in-the-stream-sm/figures/sparse_attn_decomp/distribution_n-svs_gt.pdf]

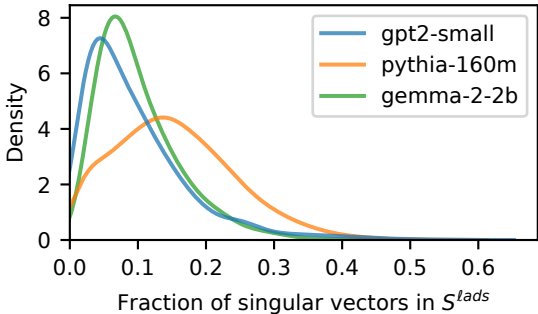

Supplement: supplementary_material [file distribution_n-svs_ioi.pdf › signals-in-the-stream-sm/figures/sparse_attn_decomp/distribution_n-svs_ioi.pdf]

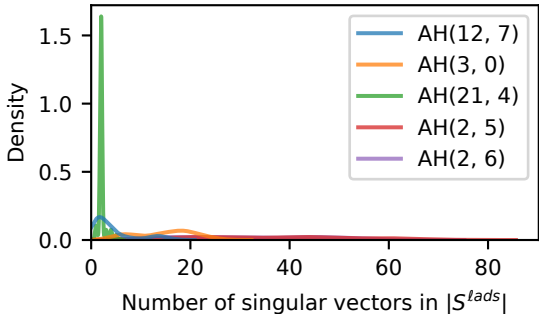

Supplement: supplementary_material [file n_svs_gemma-2-2b_gp.pdf › signals-in-the-stream-sm/figures/sparse_attn_decomp/n_svs_gemma-2-2b_gp.pdf]

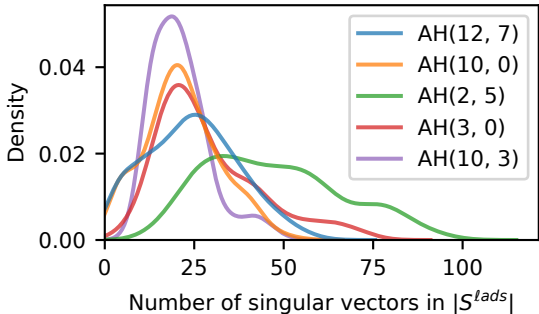

Supplement: supplementary_material [file n_svs_gemma-2-2b_ioi.pdf › signals-in-the-stream-sm/figures/sparse_attn_decomp/n_svs_gemma-2-2b_ioi.pdf]

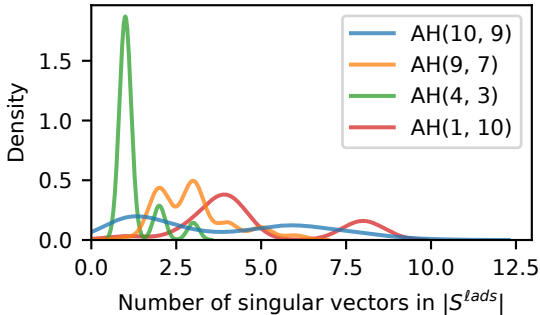

Supplement: supplementary_material [file n_svs_gpt2-small_gp.pdf › signals-in-the-stream-sm/figures/sparse_attn_decomp/n_svs_gpt2-small_gp.pdf]

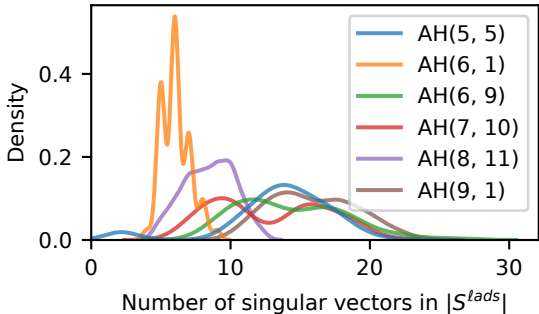

Supplement: supplementary_material [file n_svs_gpt2-small_gt.pdf › signals-in-the-stream-sm/figures/sparse_attn_decomp/n_svs_gpt2-small_gt.pdf]

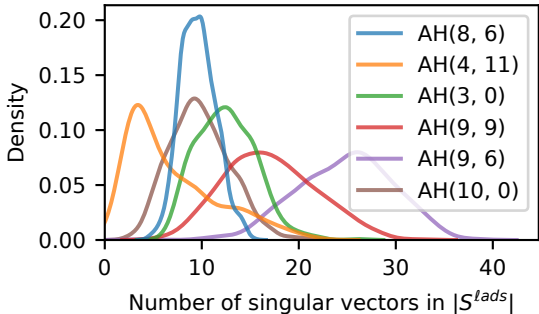

Supplement: supplementary_material [file n_svs_gpt2-small_ioi.pdf › signals-in-the-stream-sm/figures/sparse_attn_decomp/n_svs_gpt2-small_ioi.pdf]

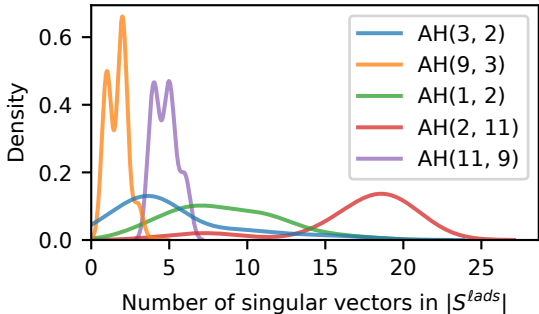

Supplement: supplementary_material [file n_svs_pythia-160m_gp.pdf › signals-in-the-stream-sm/figures/sparse_attn_decomp/n_svs_pythia-160m_gp.pdf]

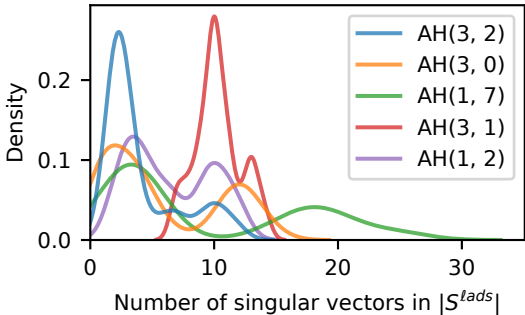

Supplement: supplementary_material [file n_svs_pythia-160m_gt.pdf › signals-in-the-stream-sm/figures/sparse_attn_decomp/n_svs_pythia-160m_gt.pdf]

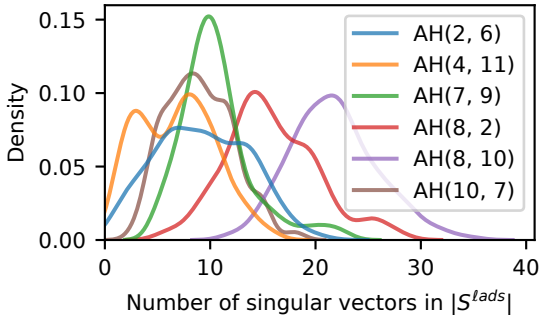

Supplement: supplementary_material [file n_svs_pythia-160m_ioi.pdf › signals-in-the-stream-sm/figures/sparse_attn_decomp/n_svs_pythia-160m_ioi.pdf]

<bos> Then , Simon and Andrew were working at the restaurant . Simon decided to give a basketball to

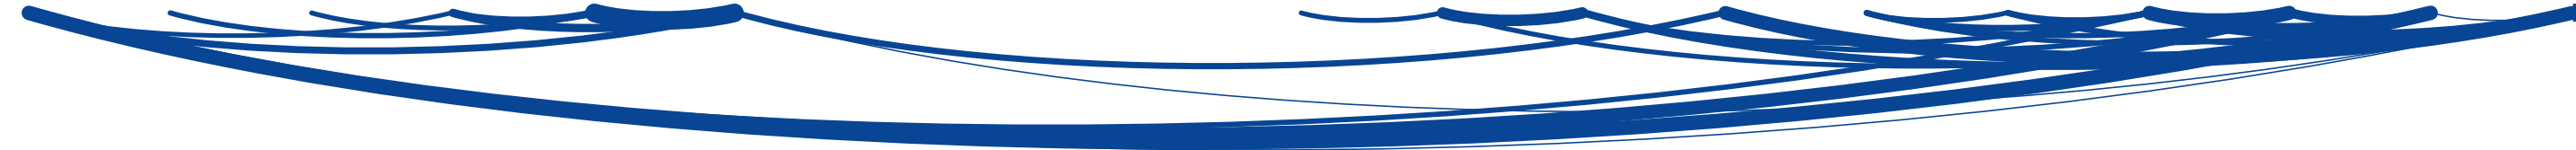

Supplement: supplementary_material [file gemma-2-2b_ioi_pid-148_graph-aggregated.pdf › signals-in-the-stream-sm/graph_plots/aggregated_graphs/gemma-2-2b_ioi_pid-148_graph-aggregated.pdf]

Then , Simon and Andrew were working at the restaurant . Simon decided to give a basketball to

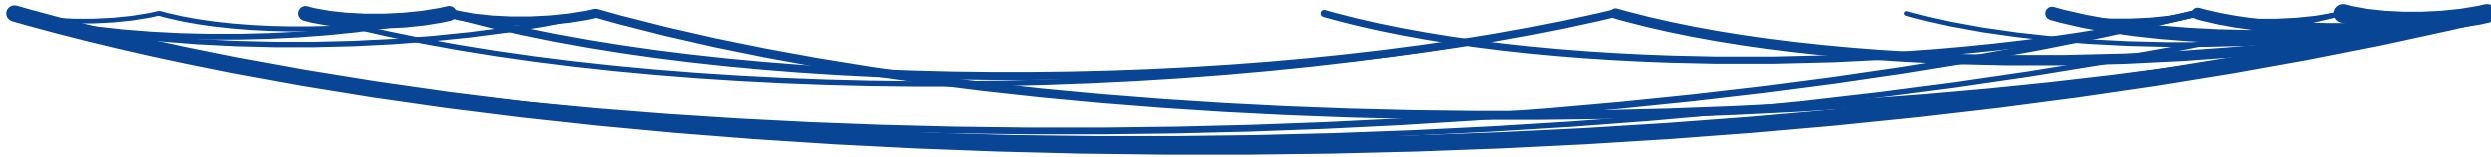

Supplement: supplementary_material [file gpt2-small_ioi_pid-148_graph-aggregated.pdf › signals-in-the-stream-sm/graph_plots/aggregated_graphs/gpt2-small_ioi_pid-148_graph-aggregated.pdf]

Then , Simon and Andrew were working at the restaurant . Simon decided to give a basketball to

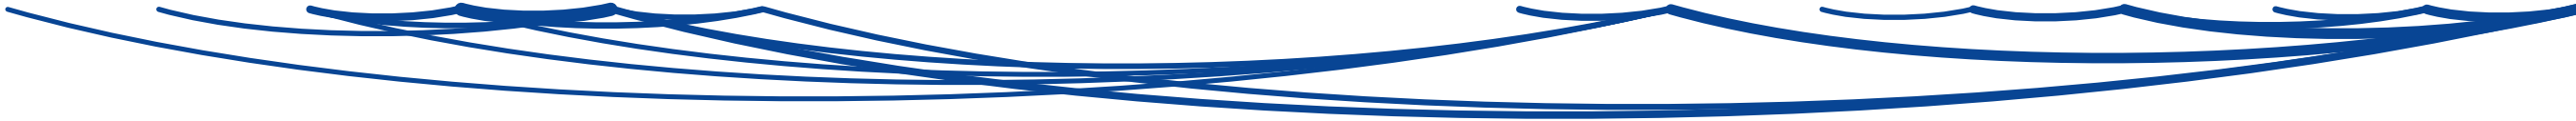

Supplement: supplementary_material [file pythia-160m_ioi_pid-148_graph-aggregated.pdf › signals-in-the-stream-sm/graph_plots/aggregated_graphs/pythia-160m_ioi_pid-148_graph-aggregated.pdf]

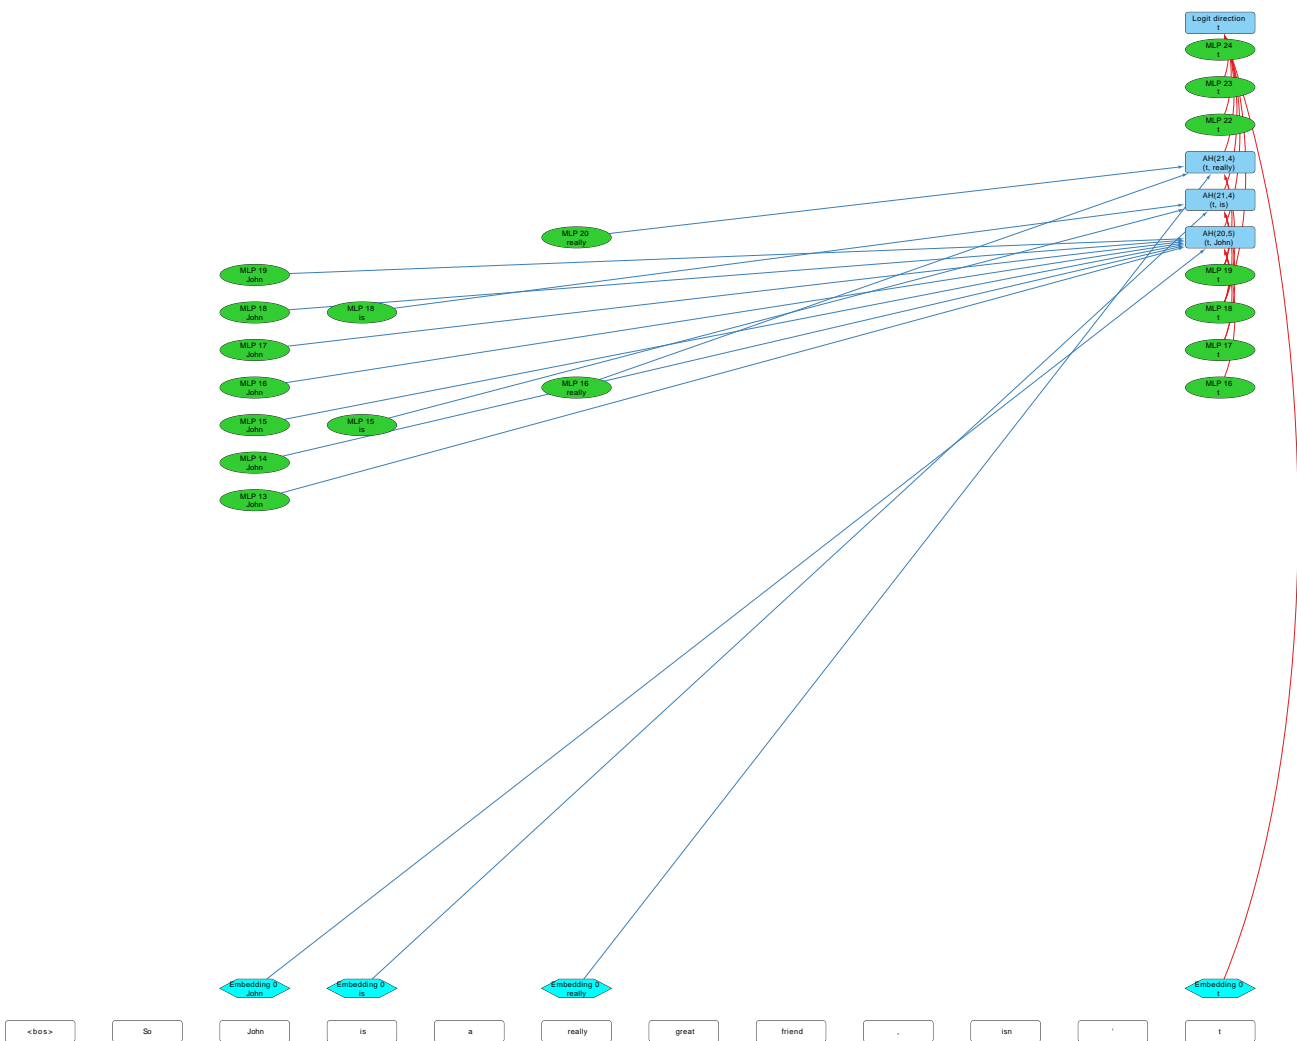

Supplement: supplementary_material [file gemma-2-2b_gp_pid-0_graph.pdf › signals-in-the-stream-sm/graph_plots/gemma-2-2b_gp_pid-0_graph.pdf]

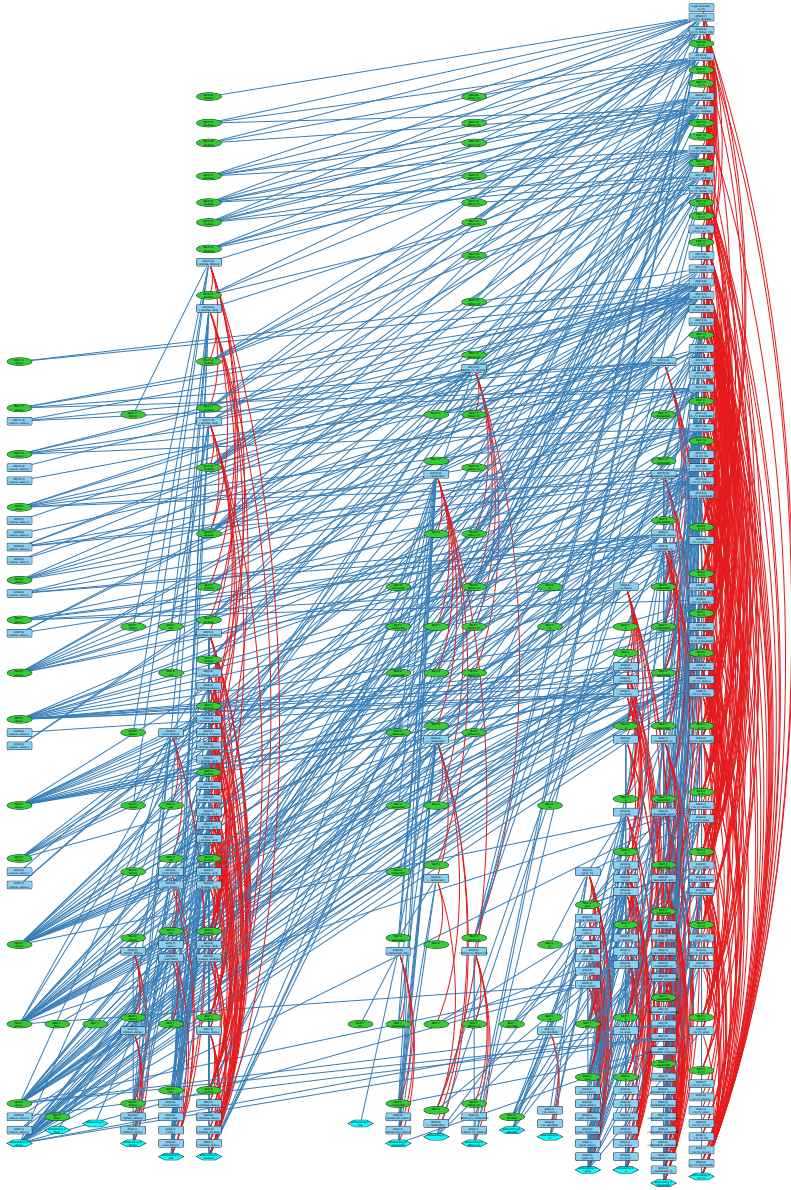

Supplement: supplementary_material [file gemma-2-2b_ioi_pid-148_graph.pdf › signals-in-the-stream-sm/graph_plots/gemma-2-2b_ioi_pid-148_graph.pdf]

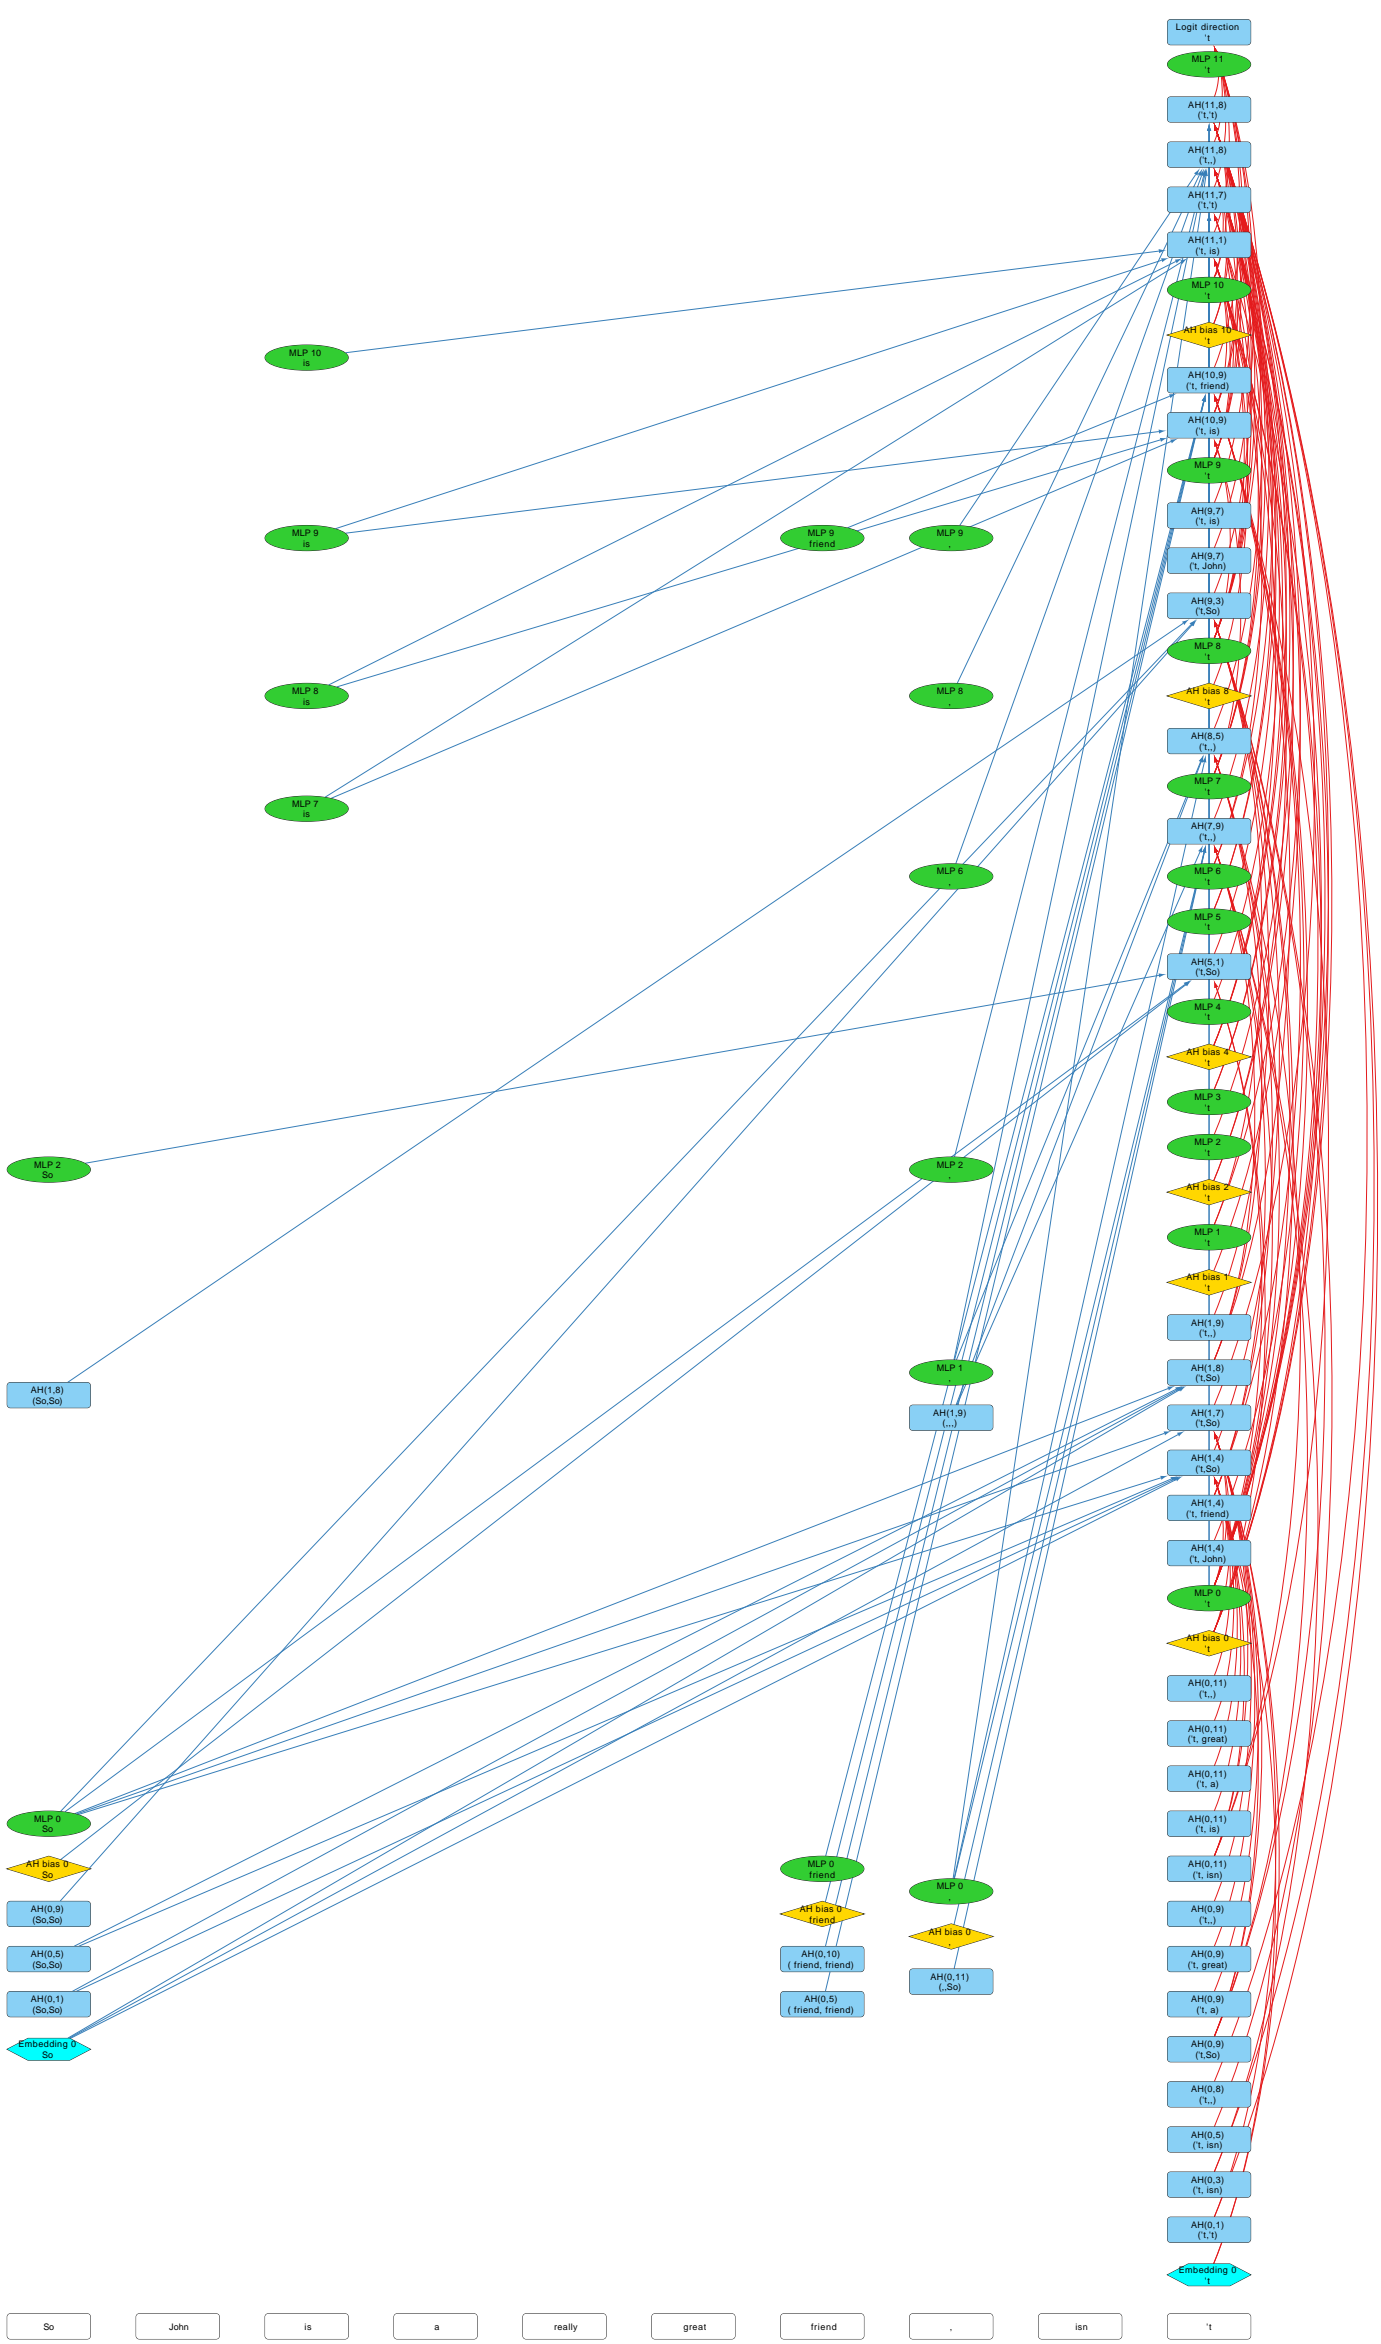

Supplement: supplementary_material [file gpt2-small_gp_pid-0_graph.pdf › signals-in-the-stream-sm/graph_plots/gpt2-small_gp_pid-0_graph.pdf]

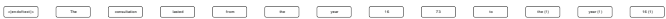

Supplement: supplementary_material [file gpt2-small_gt_pid-71_graph.pdf › signals-in-the-stream-sm/graph_plots/gpt2-small_gt_pid-71_graph.pdf]

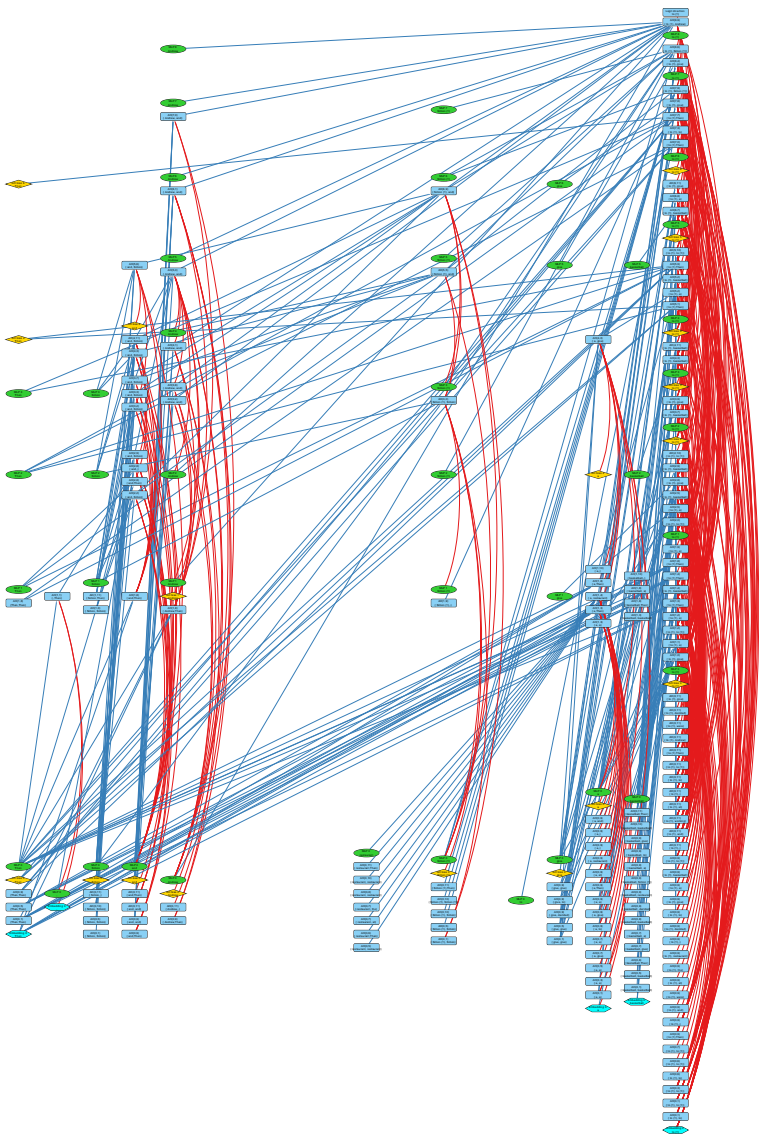

Supplement: supplementary_material [file gpt2-small_ioi_pid-148_graph.pdf › signals-in-the-stream-sm/graph_plots/gpt2-small_ioi_pid-148_graph.pdf]

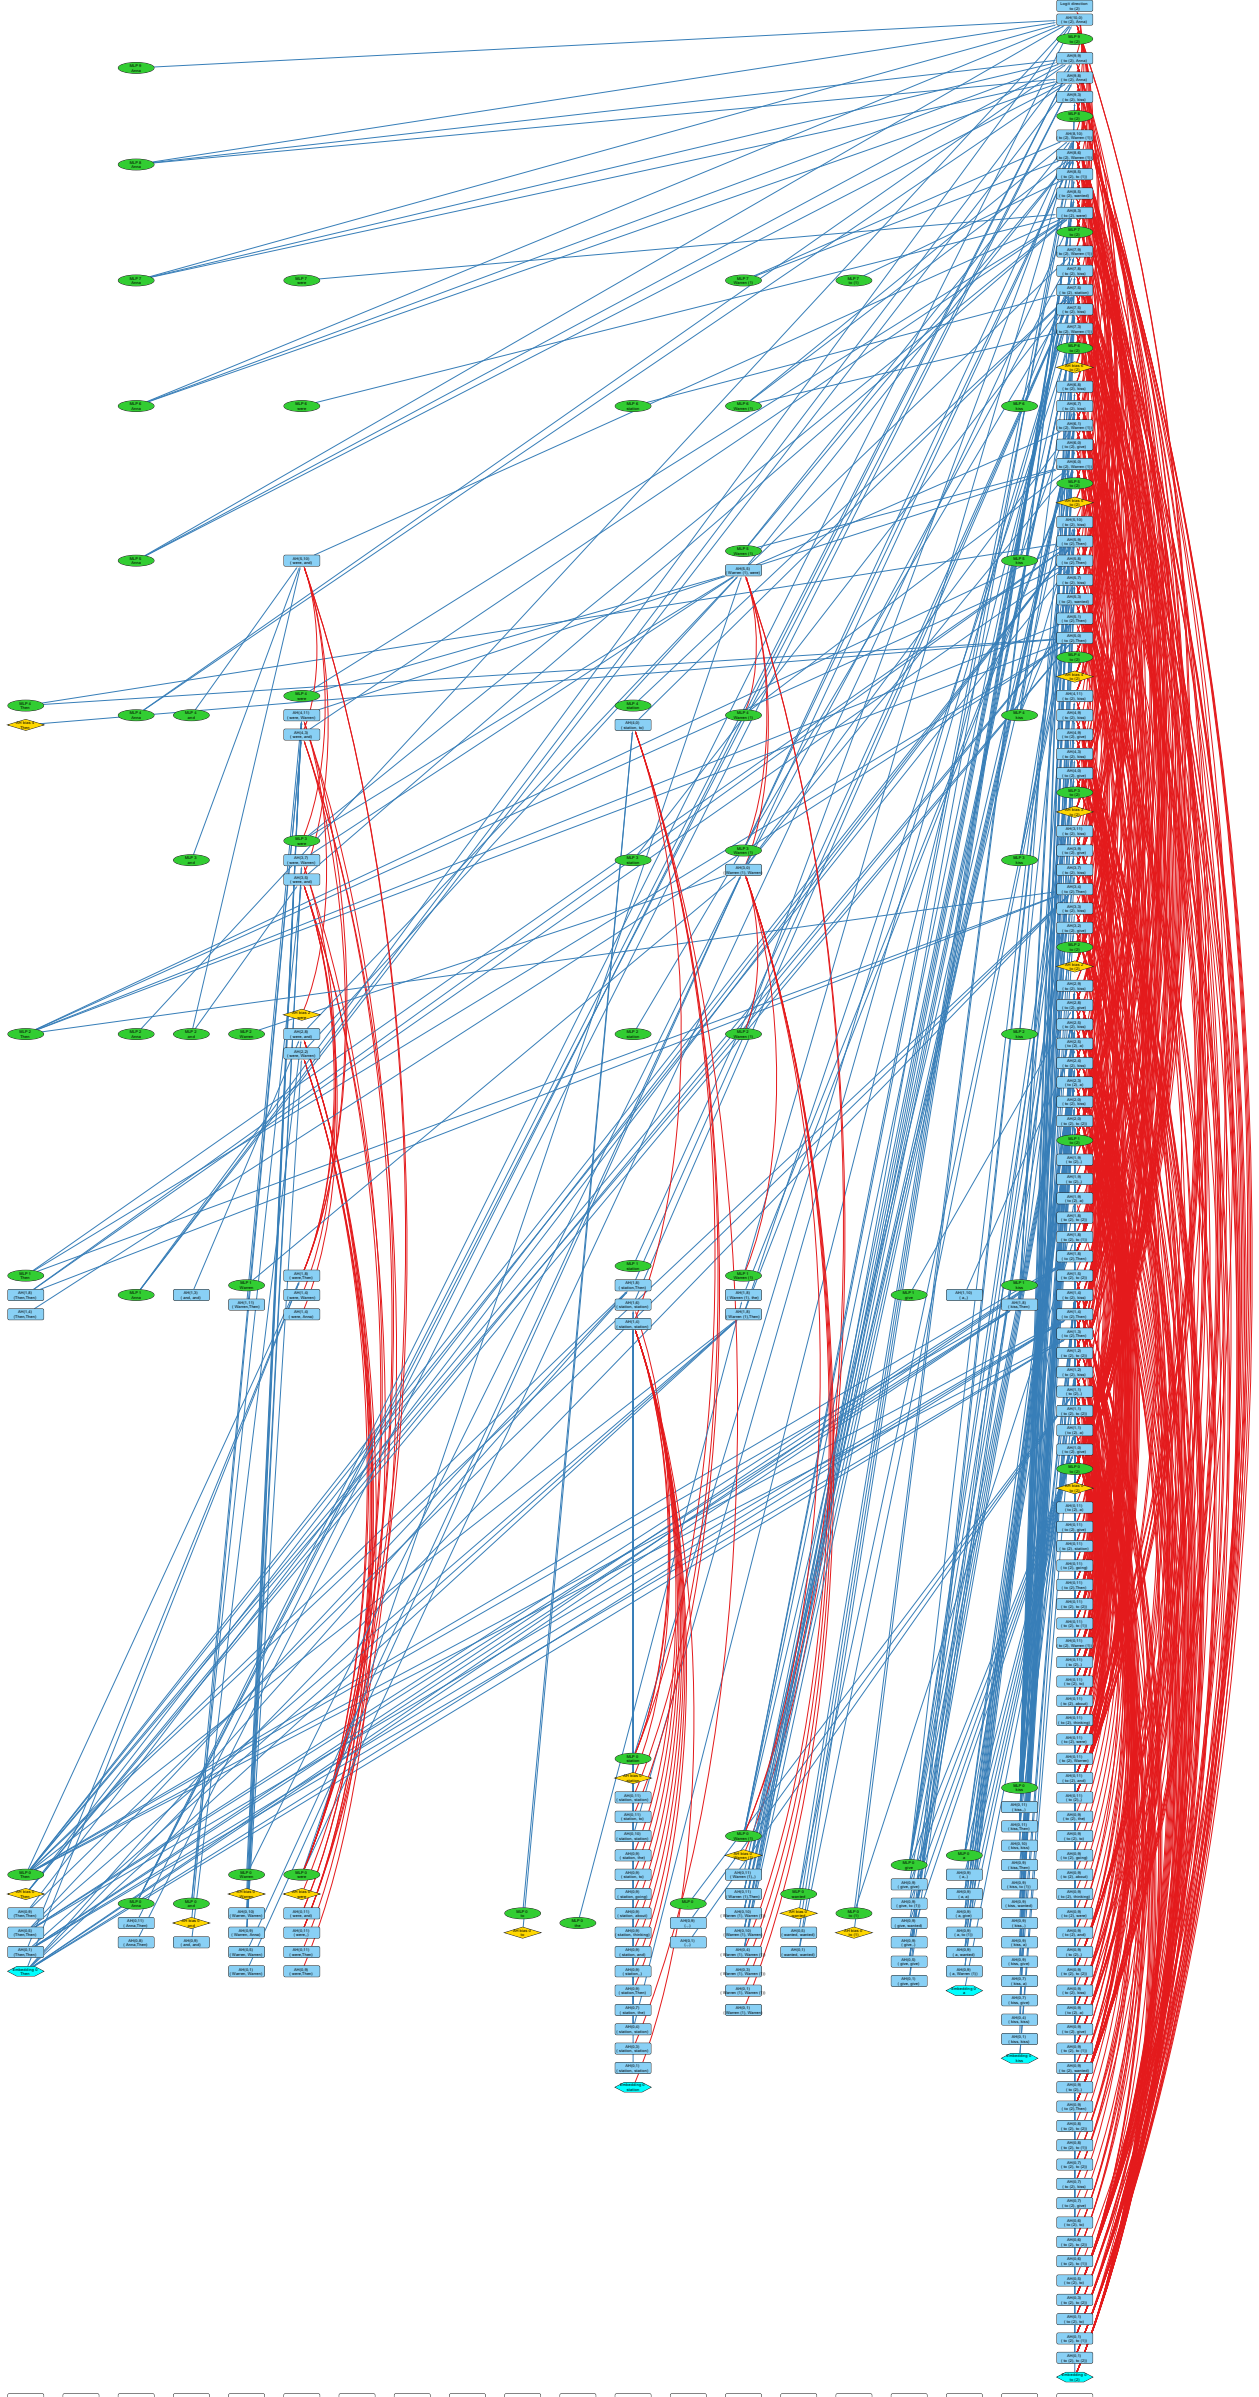

Supplement: supplementary_material [file gpt2-small_ioi_pid-1_graph.pdf › signals-in-the-stream-sm/graph_plots/gpt2-small_ioi_pid-1_graph.pdf]

So John is a really great friend , isn 't

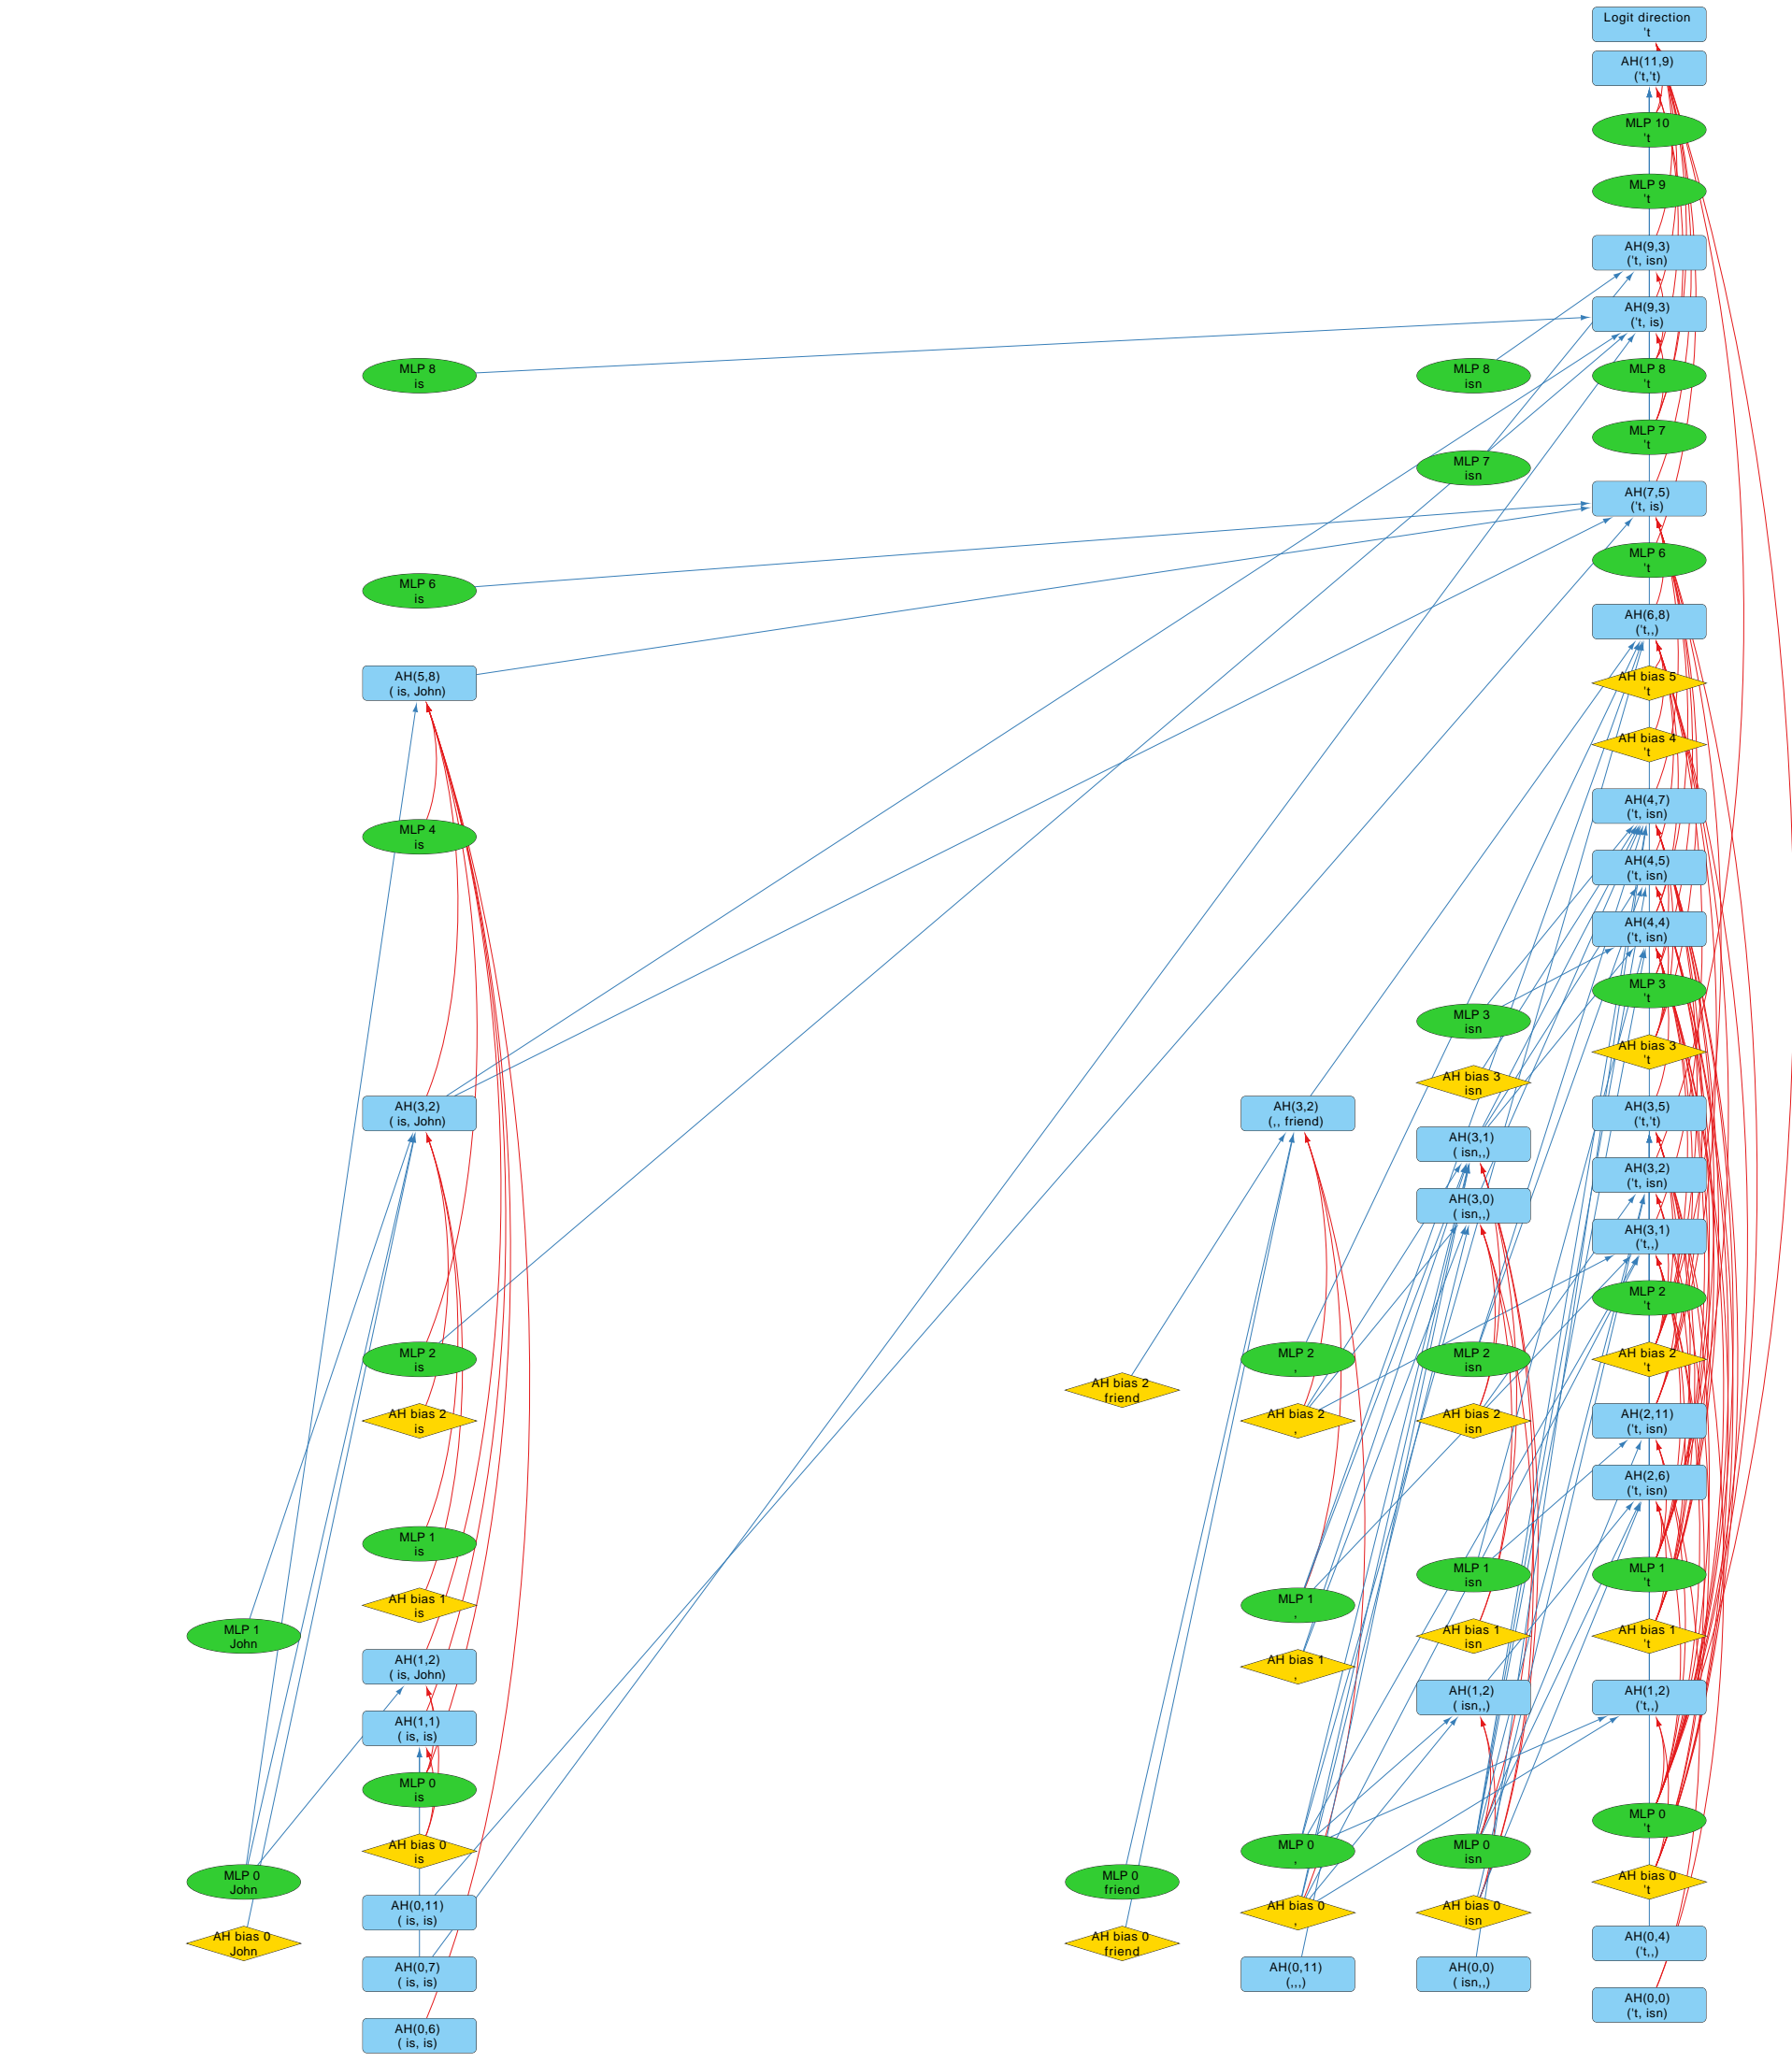

Supplement: supplementary_material [file pythia-160m_gp_pid-0_graph.pdf › signals-in-the-stream-sm/graph_plots/pythia-160m_gp_pid-0_graph.pdf]

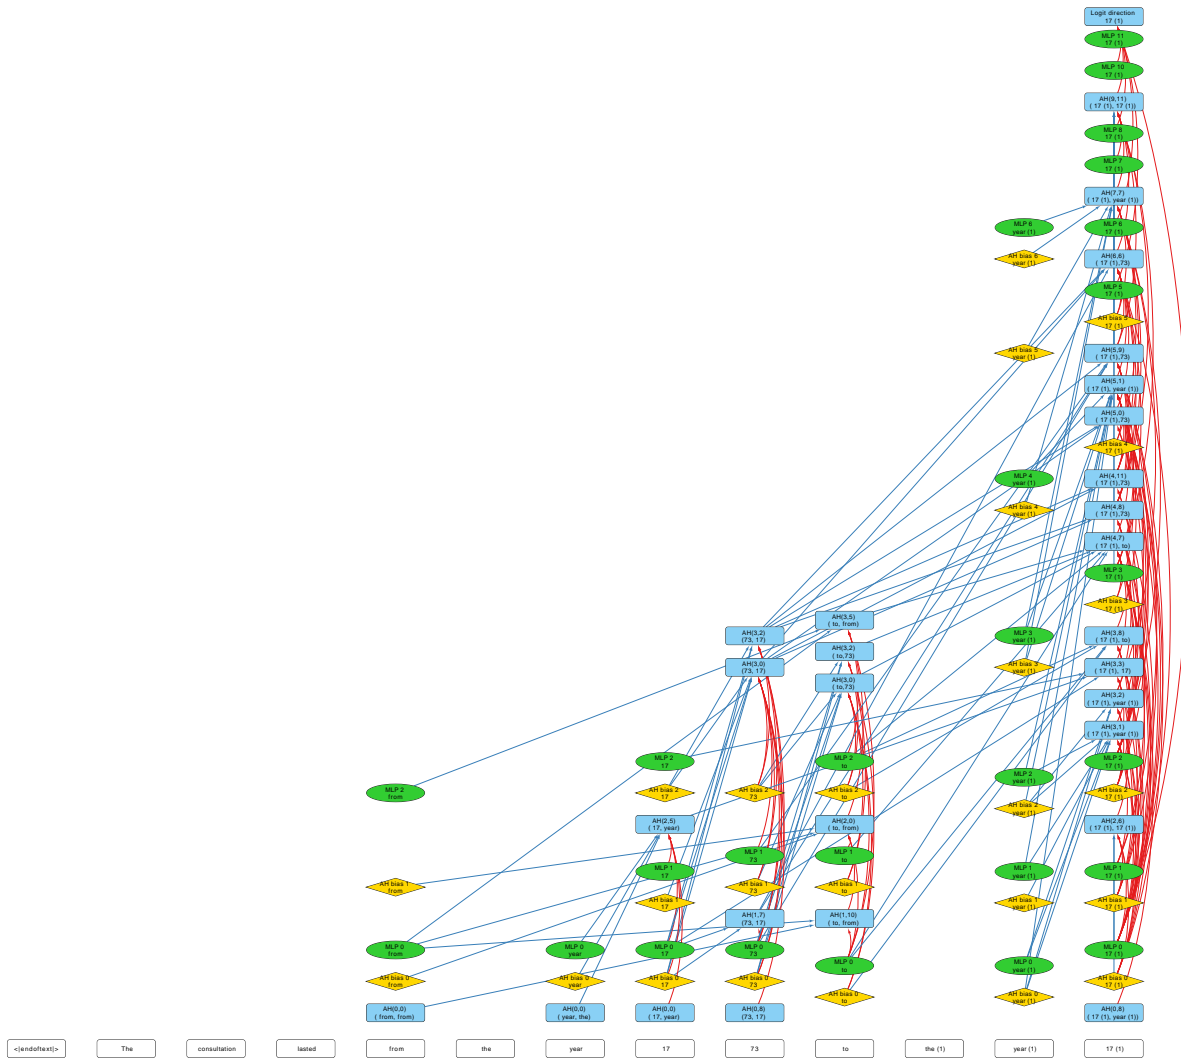

Supplement: supplementary_material [file pythia-160m_gt_pid-71_graph.pdf › signals-in-the-stream-sm/graph_plots/pythia-160m_gt_pid-71_graph.pdf]

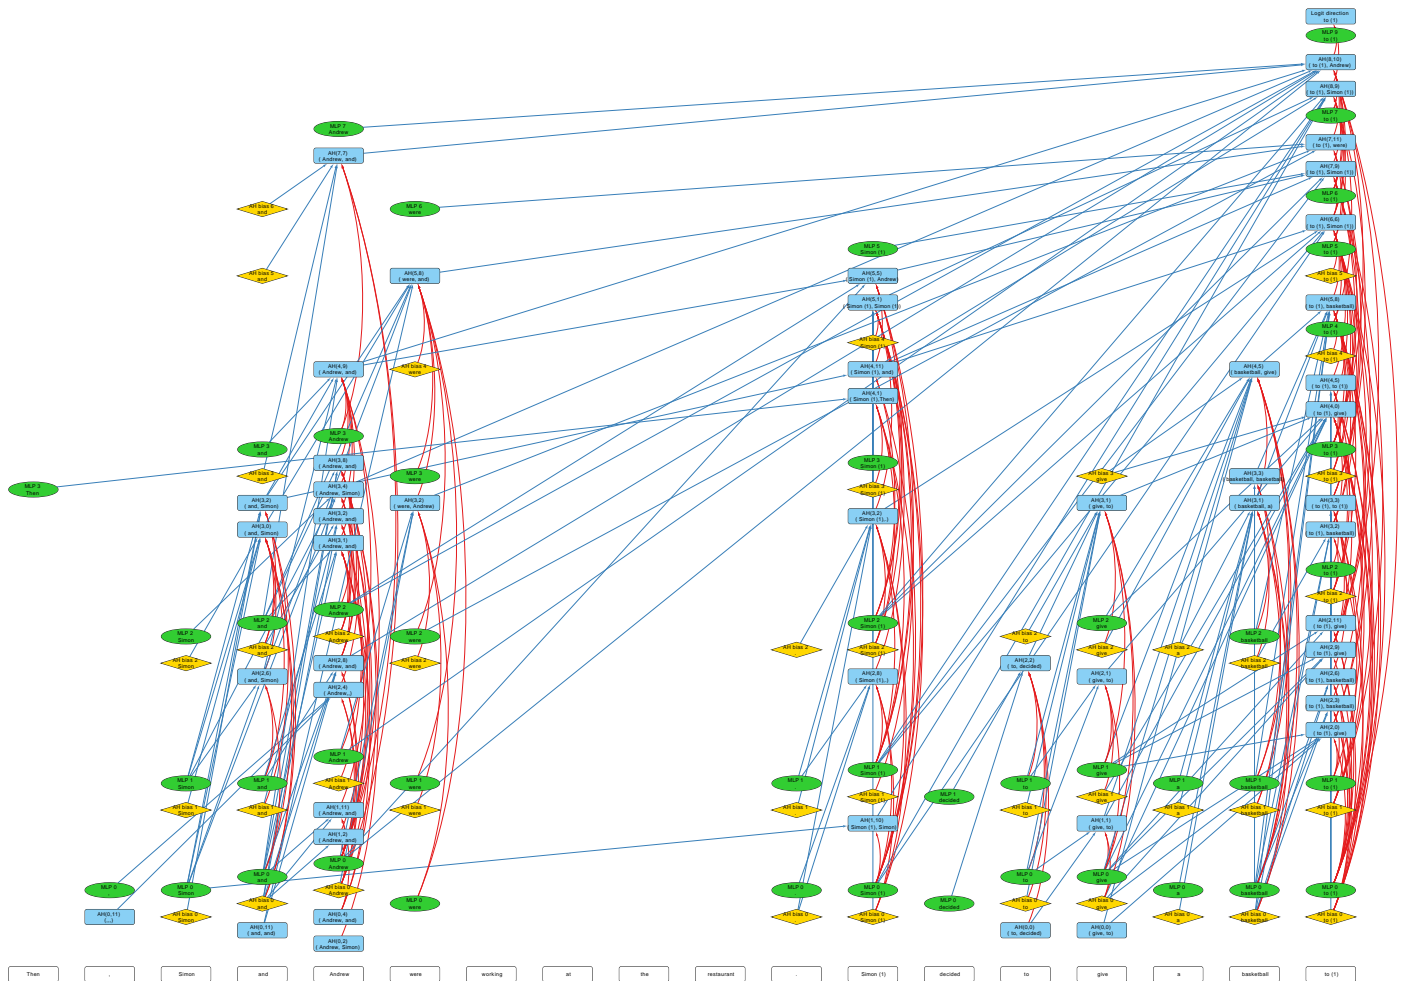

Supplement: supplementary_material [file pythia-160m_ioi_pid-148_graph.pdf › signals-in-the-stream-sm/graph_plots/pythia-160m_ioi_pid-148_graph.pdf]

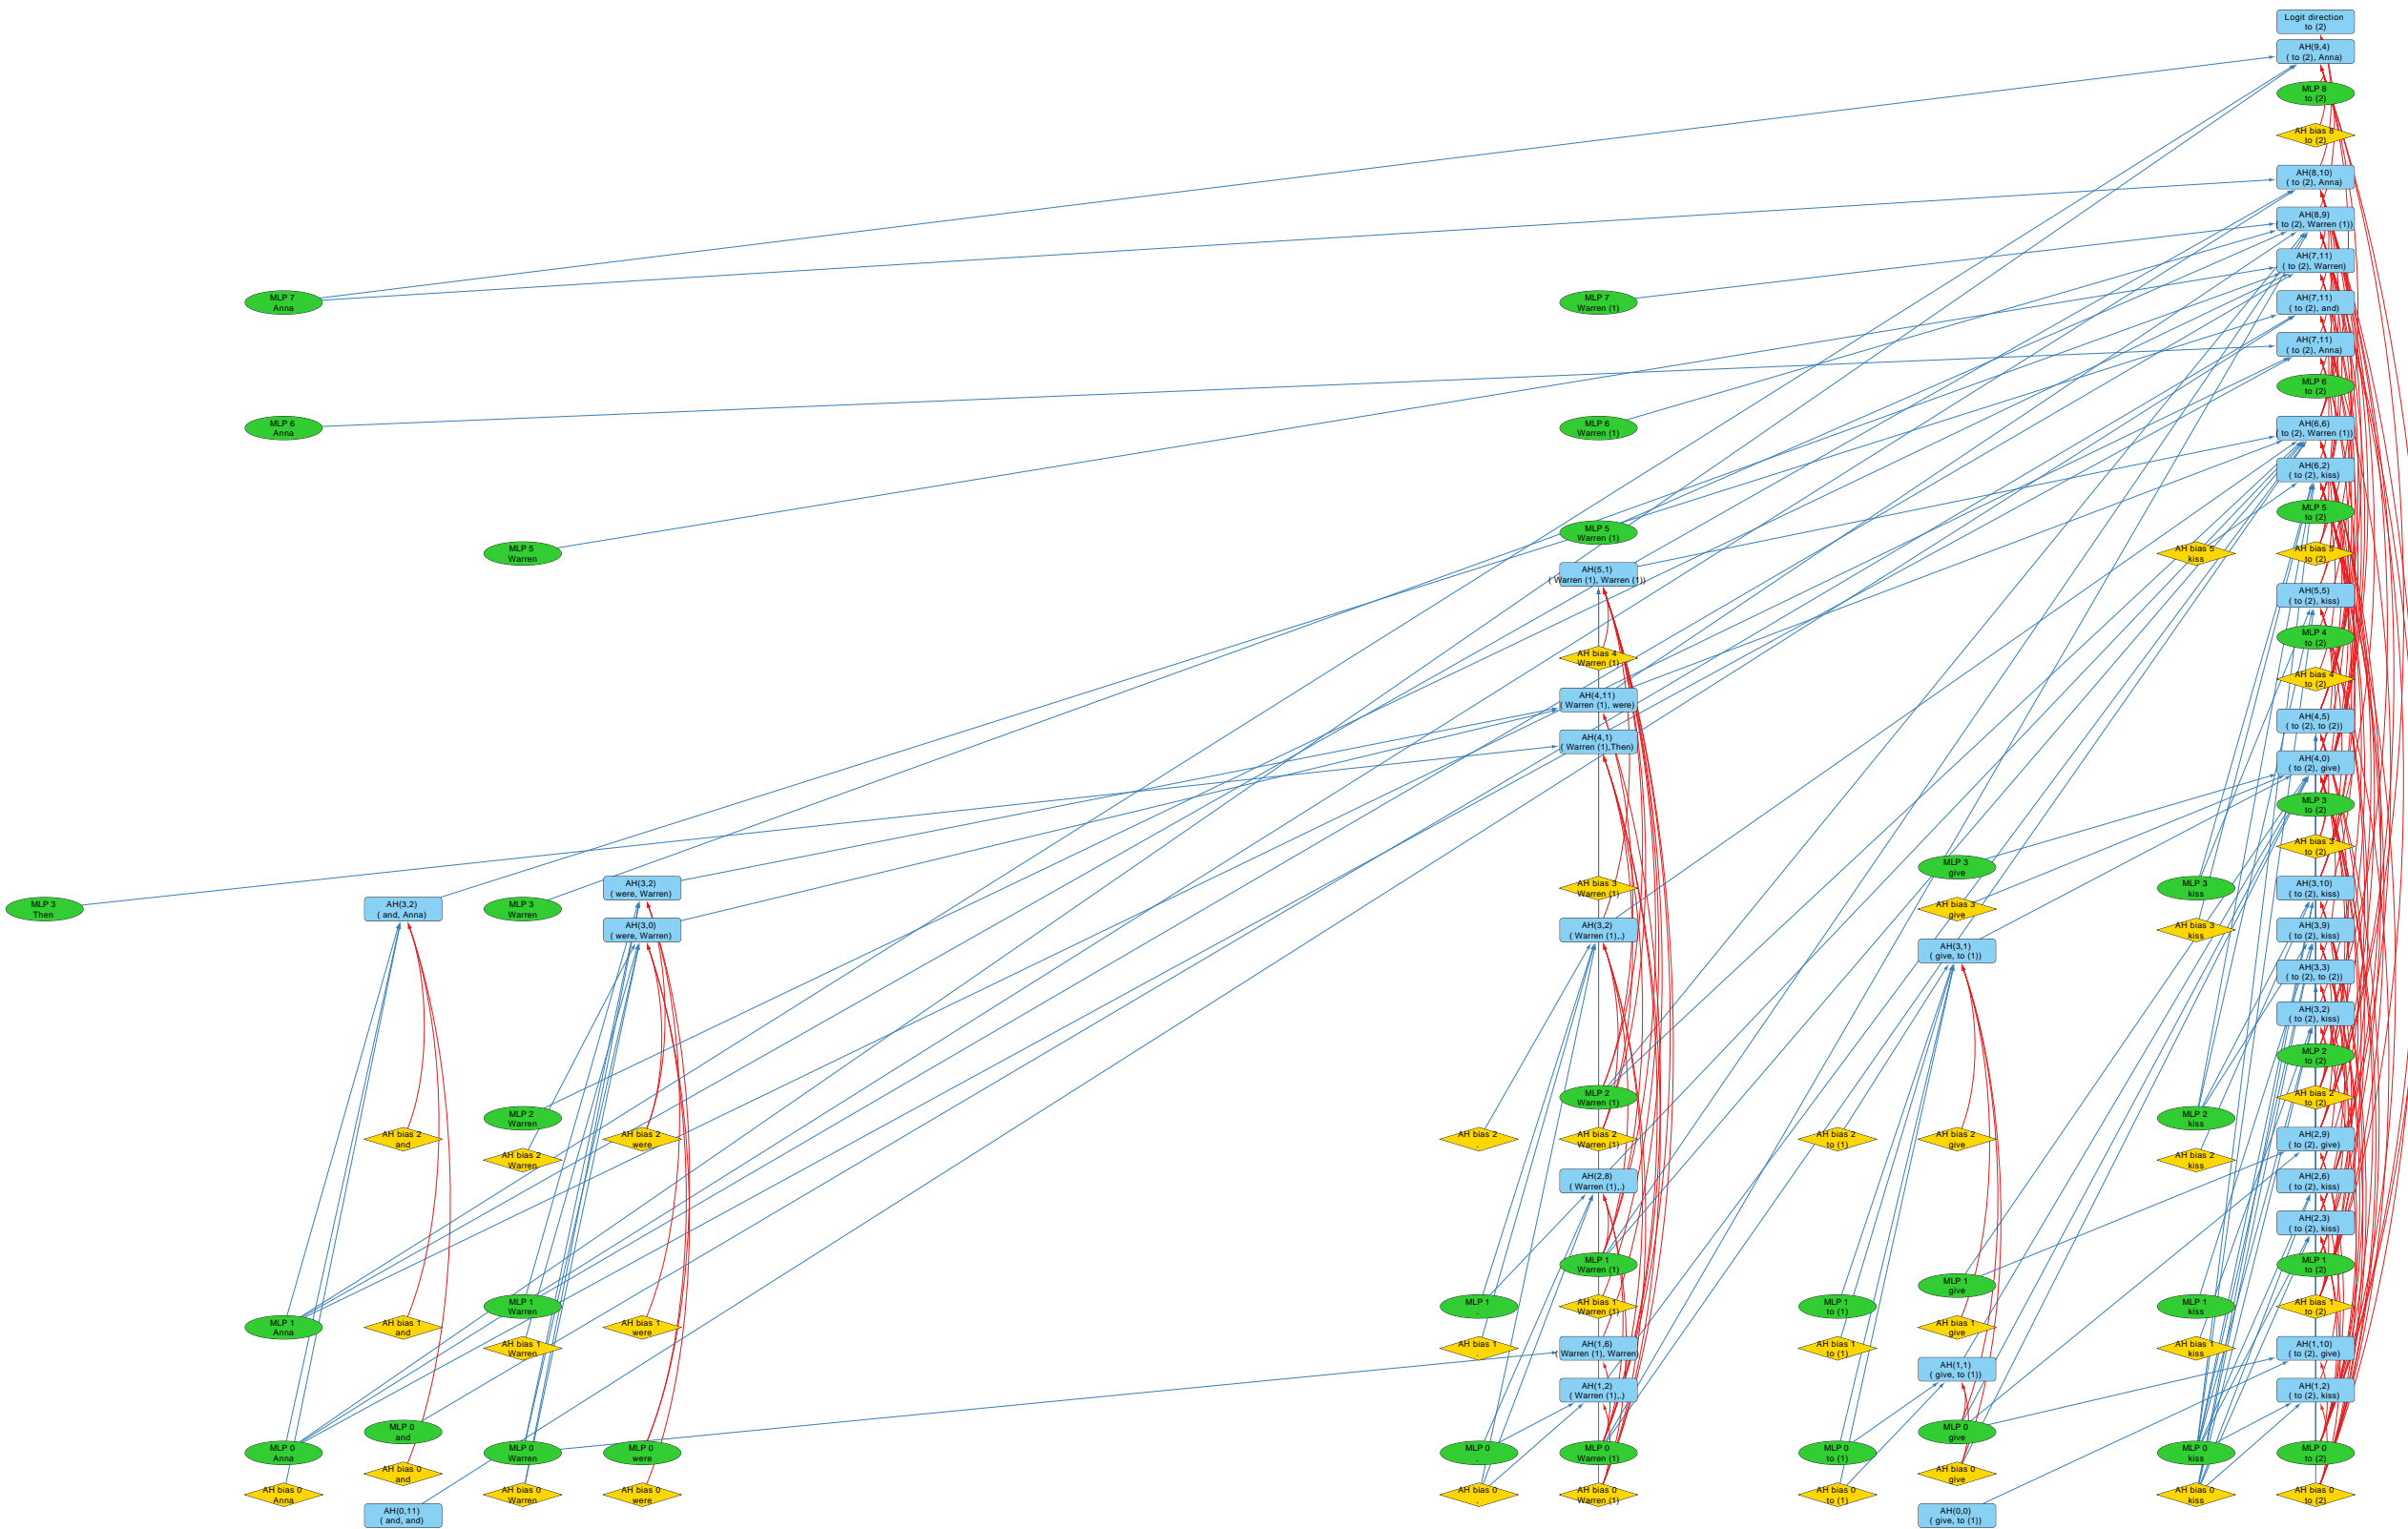

Then . Anna and Warren were thinking about going to the station . Warren (1) wanted to (1) give a kiss to (2)

Supplement: supplementary_material [file pythia-160m_ioi_pid-1_graph.pdf › signals-in-the-stream-sm/graph_plots/pythia-160m_ioi_pid-1_graph.pdf]
